1 Diverse homeostatic and immunomodulatory roles of immune cells in the  
2 developing mouse lung revealed at single cell resolution

3 Racquel Domingo-Gonzalez<sup>1,2,\*</sup>, Fabio Zanini<sup>3,4,\*</sup>, Xibing Che<sup>1,2,5</sup>, Min Liu<sup>1,2</sup>, Robert C. Jones<sup>3</sup>,  
4 Michael A. Swift<sup>6</sup>, Stephen R. Quake<sup>3,7,8,+</sup>, David N. Cornfield<sup>1,2,5,+</sup>, Cristina M. Alvira<sup>1,2,+</sup>

5

6 \*: these authors contributed equally

7 +: these authors also contributed equally

8

9 <sup>1</sup>Division of Critical Care Medicine, Department of Pediatrics, Stanford University School of  
10 Medicine, Stanford, CA

11 <sup>2</sup>Center for Excellence in Pulmonary Biology, Stanford University School of Medicine, Stanford,  
12 CA

13 <sup>3</sup>Department of Bioengineering, Stanford University, Stanford, CA

14 <sup>4</sup>Prince of Wales Clinical School, Lowy Cancer Research Centre, University of New South Wales,  
15 Sydney, Australia

16 <sup>5</sup>Division of Pulmonary, Asthma and Sleep Medicine, Department of Pediatrics, Stanford  
17 University School of Medicine, Stanford, CA

18 <sup>6</sup>Department of Chemical and Systems Biology, Stanford University, Stanford CA

19 <sup>7</sup>Chan Zuckerberg Biohub, San Francisco, CA

20 <sup>8</sup>Department of Applied Physics, Stanford University, Stanford, CA

21

## 22 **Abstract**

23           At birth, the lungs experience a sudden transition from a pathogen-free, hypoxic, fluid-  
24 filled environment to a pathogen-rich, rhythmically distended air-liquid interface. While many  
25 studies focus on adult tissue, the heterogeneity of immune cells in the perinatal lung remains  
26 unexplored. Here, we combine single cell transcriptomics with *in situ* hybridization to present an  
27 atlas of the murine lung immune compartment during a critical period of lung development. We  
28 show that the late embryonic lung is dominated by specialized proliferative macrophages with a  
29 surprising physical interaction with the developing vasculature. These macrophages disappear  
30 after birth and are replaced by a complex and dynamic mixture of macrophage subtypes, dendritic  
31 cells, granulocytes, and lymphocytes. Detailed characterization of macrophage diversity revealed  
32 a precise orchestration of five distinct subpopulations across postnatal development to fill context-  
33 specific functions in tissue remodeling, angiogenesis, and immunity. These data both broaden the  
34 putative roles for immune cells in the developing lung and provide a framework for understanding  
35 how external insults alter immune cell phenotype during a period of rapid lung growth and  
36 heightened vulnerability.

37

## 38 **Introduction**

39           Prior to birth, the lung is maintained in a fluid-filled, immune-privileged, hypoxic  
40 environment. Upon birth, the tissue quickly transitions to an air-filled, immune-challenged, oxygen  
41 rich environment following the infant's first breath<sup>1</sup>. At this point, the distal, gas-exchanging  
42 alveoli are suddenly subjected to the mechanical forces of spontaneous ventilation and exposed to  
43 diverse pathogens present in the external environment<sup>2</sup>. Adaptation to this rapid environmental  
44 shift is necessary for perinatal survival and is mediated by complex physiologic processes  
45 including reduced pulmonary arterial pressure, an exponential increase in pulmonary blood flow,  
46 establishment of air-liquid interface, and surfactant production<sup>3</sup>. The immune system is essential  
47 for lung homeostasis, wound-healing and response to pathogens<sup>4</sup>. Although the development of  
48 the murine immune system begins during early embryogenesis, little is known regarding how the  
49 dynamic physiologic changes at birth alter the lung immune cell landscape, and whether specific  
50 immune cell subpopulations influence lung growth and remodeling in addition to serving  
51 established immunomodulatory functions.

52 Immune cells play a central role in the development of many organs. Innate and adaptive  
53 immune cells regulate epithelial architecture during mammary gland development by promoting  
54 terminal end bud elongation and impairing ductal invasion<sup>5</sup>. Lymphocytes play a key role in  
55 oligodendrogenesis and synapse formation<sup>6</sup>, and macrophages inform kidney<sup>7</sup>, brain<sup>8</sup>, and retina<sup>9</sup>  
56 organogenesis. In highly vascularized organs, macrophages localize to the tips of vascular sprouts  
57 to enhance vascular network complexity<sup>9</sup>, promote angiogenesis<sup>10</sup>, and regulate vascular  
58 patterning<sup>11</sup>. Although proximal lung branching occurs during early gestation, the development of  
59 distal airspaces capable of gas exchange begins only just before birth during the saccular stage of  
60 development. These sacculi are subsequently divided into millions of alveoli after birth during  
61 alveolarization, the final stage of development characterized by rapid lung parenchymal and  
62 vascular growth<sup>12</sup>. Whether temporal regulation of specific immune populations informs lung  
63 immune function or the significant pulmonary parenchymal and vascular growth and remodeling  
64 occurring during early postnatal life remains unknown.

65 The prevailing notion is that the neonatal immune compartment is immature<sup>13</sup>. Limited  
66 immune competence, including attenuated innate immunity<sup>14</sup>, poor immuno-stimulatory function  
67 of antigen presenting cells<sup>15</sup>, and skewed adaptive immune responses may underlie the heightened  
68 susceptibility of infants to viral and bacterial infections<sup>13</sup>. Although the neonatal immune system  
69 can be induced to manifest adult-like responses under certain conditions<sup>16</sup>, this type-2-skewed  
70 immune environment likely facilitates immuno-surveillance and metabolic and tissue  
71 homeostasis<sup>17</sup>. Given that organ development occurs as the immune cell landscape is rapidly  
72 evolving, identifying the specific immune subpopulations present at discrete time points is vital to  
73 inform how immune cell diversity, localization, and cell-cell interactions may influence lung  
74 function and structure during early postnatal development.

75 In this report, we combined single cell transcriptomics (scRNA-Seq) with fluorescent  
76 multiplexed *in situ* hybridization (FISH), and flow cytometry to characterize changes in  
77 composition, localization, and function of immune cells in the murine lung from just before birth  
78 through the first three weeks of postnatal life. At birth, immune cell heterogeneity increased  
79 dramatically from an embryonic landscape dominated by immature, proliferative macrophages to  
80 a complex landscape comprised of multiple types of macrophages, dendritic cells, granulocytes,  
81 and lymphocytes. Dynamic changes in macrophage heterogeneity were particularly striking, both  
82 transcriptionally and spatially, including the presence of embryonic macrophages encircling

83 developing vessels prior to birth. After birth, these embryonic macrophages disappear, and  
84 numerous unique macrophage populations emerge, each exhibiting unique gene signatures  
85 suggesting specific roles in immunosuppression, pathogen surveillance, angiogenesis, and tissue  
86 remodeling. Multiple populations of dendritic cells, basophils, mast cells and neutrophils are also  
87 present in the postnatal lung, expressing genes important for rapid pathogen response. In contrast,  
88 although lymphocytes increase in abundance across three weeks, they remain functionally  
89 immature and skewed toward type-2 immunity. Taken together, our data demonstrate a previously  
90 underappreciated plasticity of immune cells in the perinatal and neonatal lung suggesting unique  
91 and essential roles in regulating immune function and lung structure.

## 92 **Results**

### 93 **Diversity of the lung immune landscape increases dramatically after birth.**

94 To comprehensively define the lung immune landscape at birth, we isolated whole lungs  
95 from C57BL/6 (B6) mice at four stages of perinatal development: the early saccular (E18.5), late  
96 saccular (P1) early alveolar (P7) and late alveolar stages (P21) (Figure 1A), and quantified gene  
97 expression by scRNA-Seq. Lung tissue was isolated, the pulmonary vasculature perfused to  
98 remove circulating immune cells, and the tissue digested using an in-house optimized protocol to  
99 ensure maximal cell viability as published protocols<sup>18, 19</sup> induced high amount of cell death in the  
100 embryonic and early postnatal lung (Supplemental Figure 1). Live CD45<sup>+</sup> cells were sorted by  
101 FACS, processed by Smart-seq2 and sequenced on Illumina NovaSeq 6000 (Figure 1A). Gene  
102 expression was computed as previously described<sup>20</sup> and over 4,000 cells from 8 mice, 1 female  
103 and 1 male for each time point were analyzed, with an average of 1.03 million mapped read pairs  
104 and ~3000 genes per cell (see Methods). To quantify whether the different mice contributed  
105 spurious variation to the data, a distribution level approach was chosen. For each cell type and  
106 time point, 100 pairs of cells from either the same mouse or different mice were chosen and the  
107 distance in tSNE space calculated. The cumulative distributions for those pairs were subsequently  
108 plotted to check whether pairs from different animals had a significantly longer distance than cells  
109 from the same mouse. We found no difference in the cumulative distributions (as also evident, on  
110 a qualitative level, by observation of the embeddings), indicating the absence of significant  
111 variation between the mice at each timepoint.

112

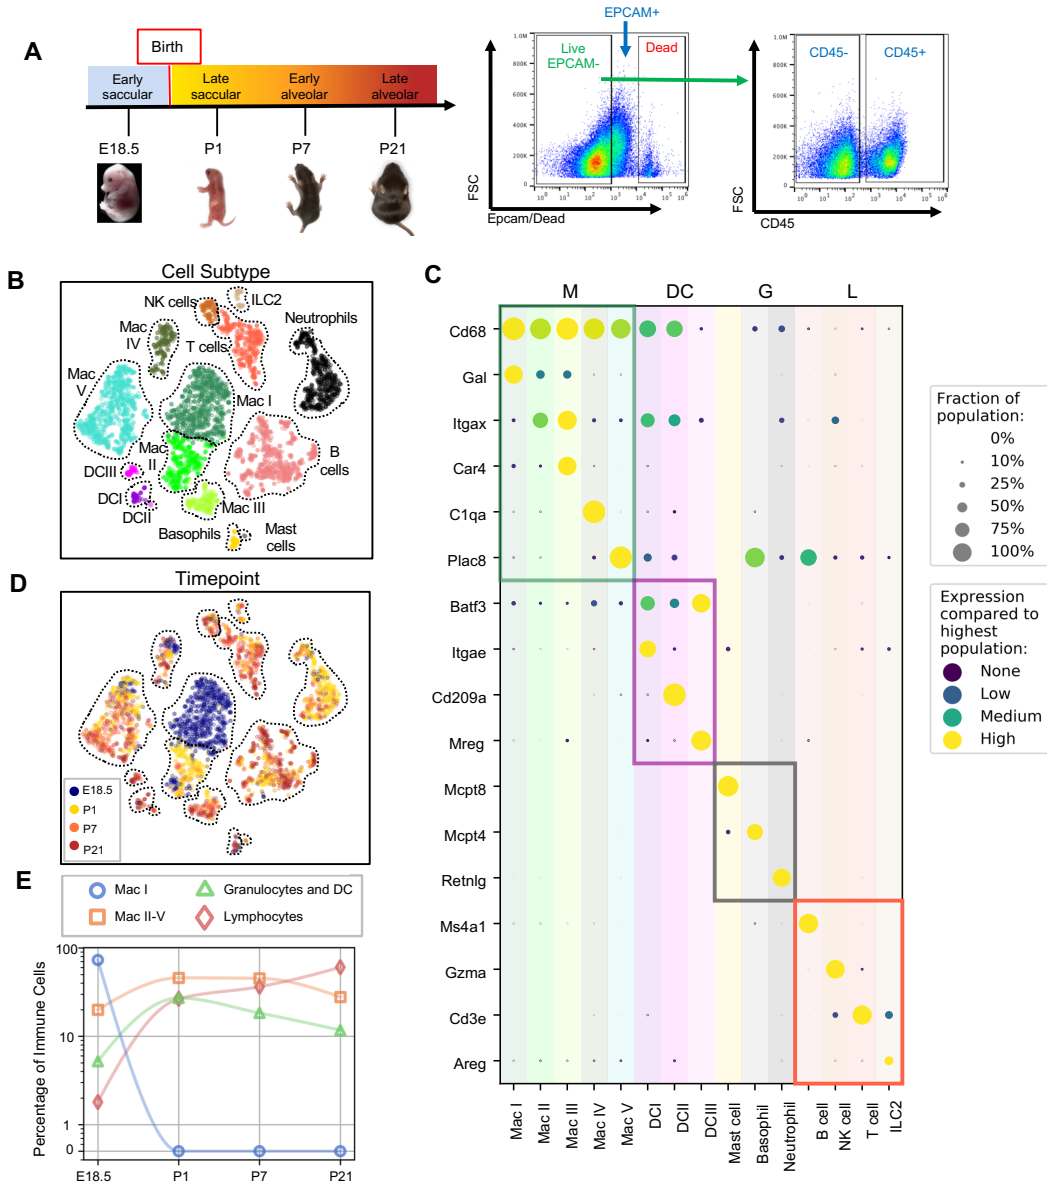

**Figure 1: Diversity of the lung immune landscape increases dramatically after birth.** (A) Overview of the experimental design including the four timepoints (E18.5, P1, P7, P21) corresponding to key stages in late lung development. Lungs were isolated, perfused, and digested and immune cells isolated by fluorescence activated cell sorting (FACS) for the dead-stain-, EPCAM-, CD45+ population. (B) t-Distributed Stochastic Neighbor Embedding (t-SNE) and unsupervised clustering of all immune cells identifies fifteen distinct populations. (C) Dot plot showing level of expression (purple to yellow), and fraction of the population expressing the particular gene (dot size) for distinguishing genes expressed by the Leiden clusters broadly separated into myeloid (M), dendritic cell (DC) granulocyte (G) and lymphocyte (L) populations. (D) t-SNE of immune cell clusters identifying developmental timepoint of cell origin with E18.5 (blue), P1 (yellow), P7 (orange) and P21 (red). (E) Quantification of the abundance of specific immune subpopulations in the lung at each developmental timepoint expressed on a  $\log^{10}$  scale as percentage of total immune cells.

113 Fifteen cell clusters were identified via Leiden community detection<sup>21</sup> and verified by t-  
 114 distributed stochastic neighbor embedding (t-SNE)<sup>22</sup> (Figure 1B). Myeloid cells separated into

115 eleven clusters, including five distinct macrophage/monocyte subpopulations with shared  
116 expression of *Cd68*, and distinguished by expression of *Gal* (Mac I), *Itgax* (Mac II), *Car4* and  
117 *Itgax* (Mac III), *Clqa* (Mac IV), or *Plac8* (Mac V). Dendritic cells (DCs) separated into three  
118 clusters, all expressing some amount of *Batf3*, but distinguished by the expression of *Itgae* (DCI),  
119 *Cd209a* (DCII), or *Mreg* (DCIII). We also identified mast cells (expressing *Mcpt4*), basophils  
120 (*Mcpt8*), and neutrophils (*Retnlg*). Four lymphoid clusters were found, consisting of B cells  
121 (expressing *Ms4a1*), T cells (*Cd3e*), natural killer (NK) cells (*Gzma*), and group 2 innate lymphoid  
122 cells (ILC2) (*Areg*) (Figure 1C).

123 We next assessed cluster distribution across time (Figure 1D and 1E). Mac I cells dominate  
124 the late embryonic lung, with fewer macrophages scattered among clusters II, IV and V and an  
125 even smaller number of granulocytes and lymphocytes. After birth, immune cell heterogeneity  
126 increased explosively, concomitant with the disappearance of Mac I. Granulocyte abundance  
127 peaked just after birth and lymphocytes abundant increased progressively.

128

### 129 **Expression of *Dab2* and *Plac8* broadly separates macrophages and monocytes.**

130 Clusters Mac I-V exhibited the most striking heterogeneity, so we analyzed their  
131 transcriptomes and spatial distribution in detail. All five clusters shared high expression of *Cd68*,  
132 indicative of macrophages or monocytes (m/m) (Figure 2A). At E18.5, Mac I comprised ~80% of  
133 m/m cells and Mac II, IV, and V each comprised 5-10% while Mac III was almost absent (Figure  
134 2B and C). After birth, Mac I disappeared while Mac II abundance peaked to 35% of the total  
135 before decreasing again and disappearing by P21. Mac III and Mac V abundance increased steadily  
136 with Mac V being most abundant at all postnatal timepoints. The Mac IV population was relatively  
137 stable over time at ~10% of the total.

138 The Mac I-V clusters broadly separated into two groups based upon expression of the  
139 disabled 2 gene (*Dab2*), which regulates macrophage polarization<sup>23</sup> and the placenta-specific 8  
140 gene (*Plac8*), which is related to bacterial immunity<sup>24</sup>. Mac I-IV cells expressed *Dab2* but not  
141 *Plac8* while Mac V showed the opposite pattern (Figure 2D). We confirmed by multiplexed FISH  
142 that all *Cd68*<sup>+</sup> cells in the lung expressed either *Dab2* or *Plac8* at both E18.5 and P7 (Figure 2E).  
143 *Dab2* and *Plac8* expression was not consistent with previously reported markers of macrophage  
144 lineages derived from yolk sac and fetal liver<sup>25,26</sup> (Supplemental Figure 2A).

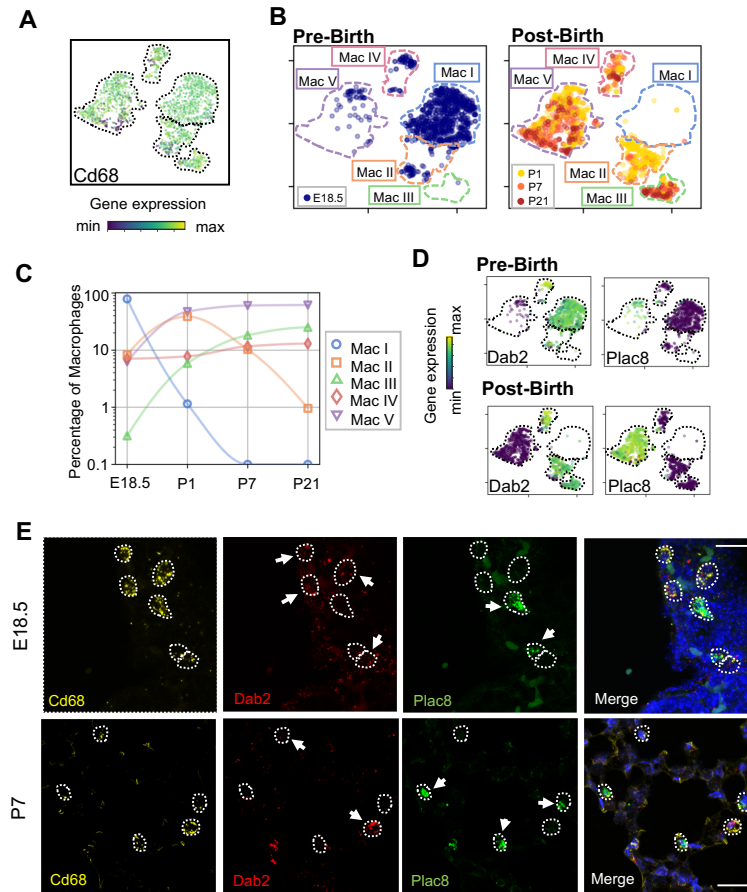

**Figure 2: Macrophage populations present before and after birth broadly separate into two populations based on expression of *Dab2* and *Plac8*.** (A) t-SNE plot depicting *Cd68* expression in the five macrophage populations. (B) Separate embeddings for prenatal versus postnatal macrophages, identifying developmental timepoint of cell origin with E18.5 (blue), P1 (yellow), P7 (orange) and P21 (red). (C) Quantification of the abundance of each macrophage subpopulations at each developmental timepoint expressed on a  $\log^{10}$  scale as percentage of total macrophages. (D) t-SNE plots depicting expression of *Dab2* and *Plac8* within the macrophages present pre- and post-birth. (E) Multiplexed *in situ* hybridization to detect gene expression of *Cd68* (yellow), *Dab2* (red), and *Plac8* (green) in lung tissue from mice at E18.5 and P7. Calibration bar=20 $\mu$ m.

146 **Embryonic macrophages are proliferative and encircle developing vessels prior to birth.**

147 Mac I cells are the predominant immune population at E18.5, hence we aimed to  
 148 understand their function and localization. Differentially expressed genes (DEGs) in Mac I  
 149 included the proliferation markers *Mki67* and *Mcm5* (Figure 3A). Across macrophages and  
 150 monocytes, proliferation decreased from 60% of cells at E18.5 to only 10% by P21. Most  
 151 proliferating cells were Mac I prior to birth and distributed across Mac II-V after birth  
 152 (Supplemental Figure 2B). These data are consistent with prior reports of “bursts” of proliferation

153 after recruitment of macrophages into embryonic tissues, followed by low-level self-renewal by  
 154 adulthood<sup>27</sup>.  
 155

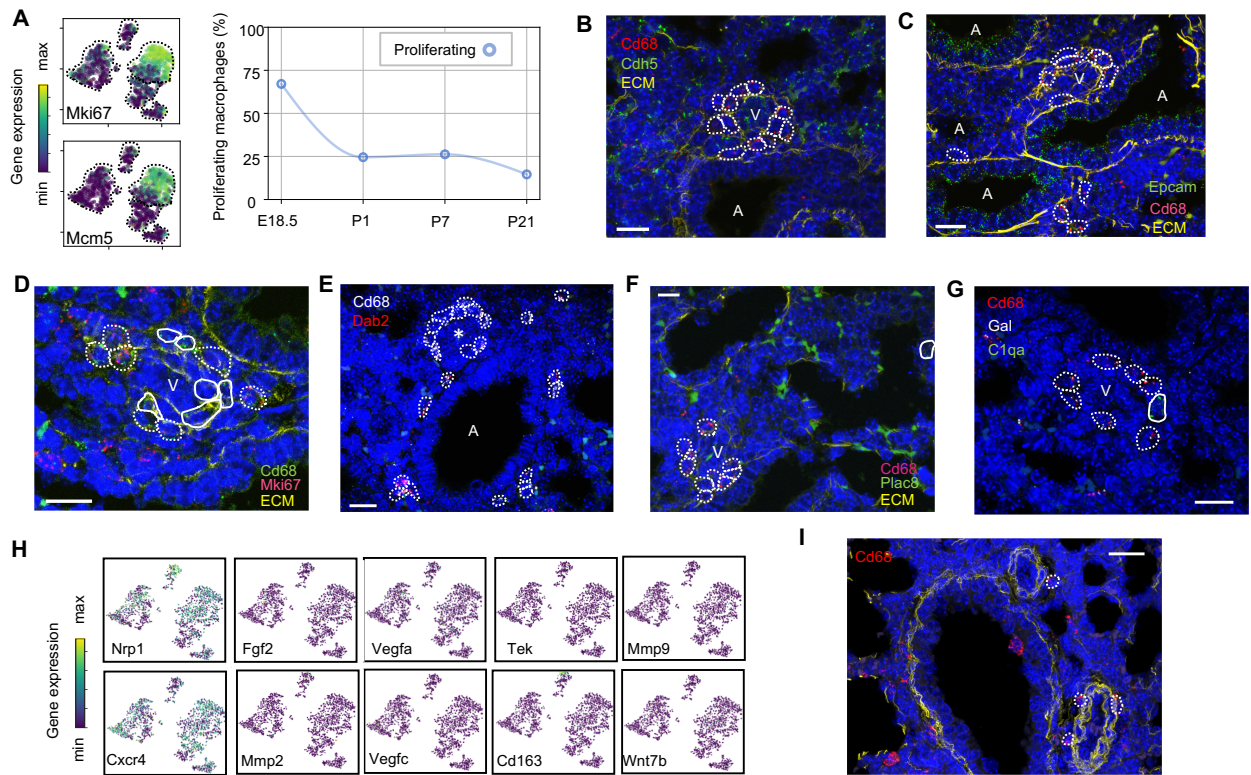

**Figure 3: Embryonic macrophages encircle developing blood vessels prior to birth.**

(A) t-SNE plots depicting expression of *Mki67* and *Mcm5* in the macrophage clusters with low expression in purple and high expression in yellow, with quantification of proliferating macrophages at each timepoint. *In situ* hybridization at E18.5 to detect: (B) *Cd68* (red) and *Cdh5* (green) demonstrating circles of macrophages around small vessels; (C) *Epcam* (green), *Cd68* (red), and extracellular matrix (ECM, yellow), with white dotted circles identifying *Cd68*<sup>+</sup> cells; (D) *Mki67* (red), *Cd68* (green), and ECM (yellow), with white dotted circles identifying *Cd68*<sup>+</sup>*Mki67*<sup>+</sup> cells, and solid circles identifying *Cd68*<sup>+</sup> *Mki67*<sup>-</sup> cells; (E) *Cd68* (white) and *Dab2* (red) with white dotted circles identifying *Cd68*<sup>+</sup>*Dab2*<sup>+</sup> macrophages; (F) *Plac8* (green), *Cd68* (red), and ECM (yellow), with white dotted circles identifying *Cd68*<sup>+</sup>*Plac8*<sup>-</sup> cells and solid circles *Cd68*<sup>+</sup>*Plac8*<sup>+</sup> cells; (G) *Cd68*, *C1qa*, and *Gal*. (H) t-SNE plots of genes previously associated with a perivascular macrophage phenotype. (I) *In situ* hybridization of lung at P1 to detect *Cd68* (red) and ECM (yellow), with white dotted circles identifying isolated macrophages around blood vessels.

156           Localization of Mac I cells within the E18.5 lung revealed *Cd68*<sup>+</sup> cells scattered  
 157 throughout the lung parenchyma but also, surprisingly, forming almost complete rings around  
 158 blood vessels of 20-30 μm in diameter found adjacent to large, conducting airways (Figure 3B).  
 159 In contrast, Mac I cells were not found encircling small airways (Figure 3C). Many of the vessel-  
 160 surrounding macrophages expressed *Mki67* (Figure 3D) and *Dab2* (Figure 3E) but not *Plac8*  
 161 (Figure 3F). Given that *Dab2*<sup>+</sup> cells at E18.5 include Mac IV cells, we aimed to distinguish these  
 162 from the Mac I cells by detecting the expression of *Gal* and *C1qa*, which were determined to be



163 specific markers by scRNA-Seq (see below). These studies demonstrated that the majority of  
164 *Cd68*+ macrophages surrounding the vessels were *Gal*+ with an occasional *Clqa*+ cell, indicating  
165 a predominance of Mac I and a small number of Mac IV cells comprise the perivascular  
166 macrophage population (Figure 3G). We then asked whether any of our Mac I-V clusters are  
167 related to previously reported perivascular macrophages that promote vascular remodeling in the  
168 developing hindbrain and retina<sup>28</sup>. Mac I cluster expressed *Cxcr4* and *Nrp1* but failed to express  
169 many other genes characteristic of these previously reported macrophages, suggesting a distinct  
170 phenotype (Figure 3H). Moreover, no concentric perivascular macrophages were observed at P1,  
171 consistent with a function specific to Mac I prior to birth (Figure 3I). Taken together, these data  
172 suggest that within the embryonic lung, Mac I macrophages are highly proliferative and localize  
173 to small vessels, suggesting a potential role in pulmonary vascular growth or remodeling.

174

175 **Distinct transcriptional profiles and spatial distribution suggest specific physiologic**  
176 **functions for discrete macrophage populations.**

177 Macrophage and monocyte heterogeneity increased rapidly after birth. To  
178 characterize this rising diversity we computed DEGs for each of the Mac I-V clusters (Figure 4A  
179 and Supplemental Tables 1-5). Beyond proliferation, the embryonic cluster Mac I expressed genes  
180 associated with glycolysis, reflective of the hypoxic fetal environment compared to postnatal air-  
181 breathing life. Mac I-specific DEGs also included *Crispld2*, a glucocorticoid-regulated gene  
182 previously thought to be restricted primarily to the lung mesenchyme that promotes lung  
183 branching<sup>29</sup>. *Crispld2* haploinsufficient mice exhibit impaired alveolarization and disorganized  
184 elastin deposition<sup>30</sup>. Mac I cells also expressed *Spint1*, encoding hepatocyte growth factor activator  
185 inhibitor type 1 (HAI-1), a membrane bound serine proteinase inhibitor and regulator of  
186 angiogenesis (Figure 4A and Supplemental Table 1). Loss of *Spint1*, results in a complete failure  
187 of placental vascularization and embryonic lethality at E10 that appears to result from a loss of  
188 basement membrane integrity<sup>34</sup>. The most specific marker for Mac I was *Gal*, encoding galanin,  
189 a regulatory peptide that harbors both pro- and anti-inflammatory functions<sup>35</sup>, promotes an anti-  
190 thrombotic phenotype in endocardial EC<sup>36</sup>, and regulates growth and self-renewal of embryonic  
191 stem cells<sup>37</sup>. Galanin also inhibits inflammatory and histamine-induced vascular permeability in a  
192 number of experimental models<sup>38-40</sup>, and functions as a vasoconstrictor, limiting blood flow in the

193 cutaneous microcirculation<sup>41</sup>. Localization identified Mac I cells throughout the lung parenchyma  
 194 in addition to those found encircling small vessels (Figure 4B).

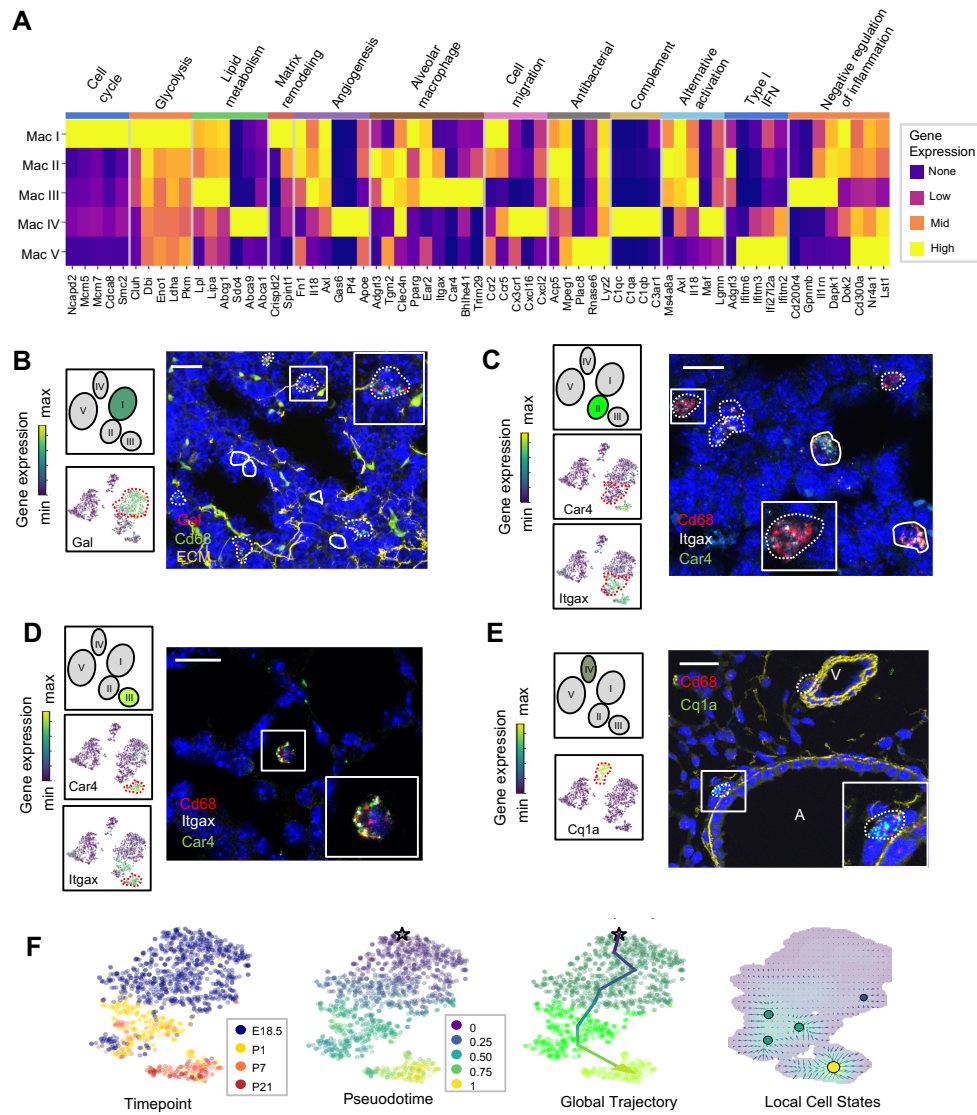

**Figure 4: Distinct transcriptional profiles and spatial distribution suggest specific physiologic functions for discrete macrophage populations.** (A) Heatmap of select differentially expressed genes within enriched pathways illustrated. (B) t-SNE plots demonstrating high expression of *Gal* in Mac I cells, and *in situ* hybridization at E18.5 to detect Mac I cells that co-express *Gal* (red) and *Cd68* (green). (C) t-SNE plots demonstrating high expression of *Itgax* but not *Car4* in Mac II cells, and *in situ* hybridization to detect Mac II cells at P1 expressing *Itgax*, and *Cd68* but not *Car4* (dotted line), and additional Mac III cells in the same image co-expressing *Itgax*, *Cd68*, and *Car4* (solid line). (D) t-SNE plots demonstrating high expression of *Itgax* and *Car4* in Mac III cells, and *in situ* hybridization detecting Mac III cells at P7 expressing *Itgax*, *Car4* and *Cd68* now located within alveoli. (E) t-SNE plot demonstrating high expression of *Clqa* in Mac IV cells, and *in situ* hybridization to detect Mac IV cells expressing *Clqa* (green) and *Cd68*(red) at P7, with ECM marked in yellow, localizing Mac IV cells abutting vessels and large airways. Calibration bar=20 mm for all panels. (F) t-SNE plot showing a developmental gradient across Mac I-III. Pseudotime ordering of the cells identified a global trajectory from the starting cell (star) in Mac I to Mac III, and local cell states revealing multiple areas of local attraction within the Mac II and Mac III clusters.

195

196           The Mac II cluster rapidly appeared after birth and expressed a gene signature suggesting  
197 a putative role in immune regulation and tissue remodeling. Mac II cells shared expression of the  
198 chemokine receptors *Ccr2* and *Ccr5* with Mac I, molecules important for immune cell migration  
199 and localization. Also similar to Mac I and III, Mac II cells expressed genes associated with matrix  
200 remodeling and angiogenesis (*Fnl1* and *Axl*)<sup>32,33</sup> (Figure 4A and Supplemental Table 2). The Mac  
201 II cluster also shared genes with Mac III important for regulating inflammation, including genes  
202 that promote intracellular killing of pathogens (*Acp5* and *Mpeg1*)<sup>34</sup>, but also genes that suppress  
203 inflammation (*Il1rn* and *Dapk1*)<sup>35,36</sup>. A subpopulation within Mac II shared high expression of  
204 major histocompatibility complex (MHC) class II genes (*H2-Ab1*, *H2-Eb1*, *Cd74*) with a subset of  
205 Mac IV (Supplemental Fig. 3) suggesting a role in antigen presentation. Overall, the transient  
206 presence of Mac II together with its transcriptional signature suggests a dual role in tissue  
207 remodeling and fine tuning of immune response required immediately after birth. Studies to  
208 localize *Itgax*+*Car4*- Mac II cells *in situ* at P1 identified them in the distal lung parenchyma, mixed  
209 with scattered Mac III cells which were located closer to the alveolar wall (Figure 4C and  
210 Supplemental Figure 4A).

211           The Mac III cluster uniquely expressed alveolar macrophage signature genes (*Car4*,  
212 *Bhlhe41*, *Trim29*) (Figure 4A, Supplemental Table 3), and genes that constrain inflammation  
213 (*Cd200r4*, *Gpnmb*, *Il1rn*)<sup>37,38</sup>. Mac III cells also expressed genes *Lpl*, *Lipa*, and *Abcg1*, indicative  
214 of their essential role in surfactant catabolism<sup>39,40</sup>. *In situ* imaging of *Itgax*+ *Car4*+ cells  
215 demonstrated that they move from the distal lung parenchyma at P1 to the alveolar lumen by P7  
216 (Figure 4D), confirming their identification as alveolar macrophages (AMs).

217           Mac IV uniquely expressed numerous proinflammatory genes<sup>41</sup> (Figure 4A), in contrast to  
218 the balanced inflammatory signature of Mac II and AMs. These included genes in the classical  
219 complement pathway (*Clqa*, *Clqb*, *Clqc*, *C3ar1*) and CCR2 ligand *Ccl12* (Supplemental Table  
220 4), suggesting a role in the localization of CCR2 expressing monocytes<sup>42</sup>. The Mac IV cells also  
221 expressed *Cxcl16*, an IFN $\gamma$  regulated chemokine that promotes T cell recruitment through  
222 CXCR6<sup>43</sup>. Mac IV also highly expressed *Mrc1* (CD206) (Supplemental Fig. 3A). However, within  
223 the Mac IV cluster there were a group of cells with lower *Mrc1* and high MHC II gene expression  
224 (*H2-Ab1*, *H2-Eb1*, and *Cd74*). These transcriptional differences within Mac IV are similar to two  
225 recently reported interstitial macrophages (IMs) in adult lung that can be differentiated by

226 expression of *Mrc1* and MHC II genes<sup>44</sup>. However, the other genes reported to distinguish those  
227 two clusters (e.g *Cd68*, *Cx3cr1*, *Mertk*, *Cclr2*) were diffusely expressed throughout the Mac IV  
228 cluster (Supplemental Fig. 3B). *In situ* imaging to localize *Clqa*+*Cd68*+ cells in the postnatal lung  
229 found Mac IV cells remained abutting small blood vessels as well as the abluminal side of large  
230 airways (Figure 4E). The characteristic location and the expression of numerous genes important  
231 for leukocyte recruitment and pathogen defense suggest that Mac IV may serve as patrollers,  
232 playing a key role in immune-surveillance, innate pathogen defense, and antigen presentation.

233 The transient presence of the Mac II cells, and significant overlap with the transcriptomes  
234 of Mac I, and III, suggested that Mac II may represent an intermediate population. To determine  
235 if cells within these clusters were undergoing gradual transcriptional shifts across time, we  
236 performed pseudotime analysis on cells from clusters Mac I, II, and III. Ordering of the cells within  
237 the Mac clusters I-III by pseudotime (Figure 4F) defined a global trajectory from the Mac I to the  
238 Mac III cluster, indicating a correspondence between pseudo- and real time during perinatal  
239 development. This global trajectory notwithstanding, there were multiple local attractor states  
240 within the Mac II cluster, suggesting that cells gradually shift from Mac I to Mac II, and  
241 subsequently remain in that phenotypic state for some time before further committing to a specific  
242 fate. Interestingly, one of these local attractor states corresponded with the subpopulation  
243 expressing MHC class II genes also found in a subset of Mac IV cells. Taken together, our data  
244 suggest that the Mac II cells derive from Mac I and represents a transitional population that may  
245 serve a temporal-specific function and later differentiates into Mac III cells (i.e. alveolar  
246 macrophages) and potentially the antigen-presenting subset of Mac IV cells.

247

#### 248 **Mac V monocytes are characterized by developmental gene expression gradients.**

249 The Mac V cluster was characterized by expression of *Plac8*<sup>45</sup> (Figure 1E), a gene  
250 expressed by a recently identified population of “CD64+ CD16.2+ non-classical monocytes” in  
251 the adult mouse lung<sup>44</sup>, suggesting a monocytic phenotype. Mac V monocytes also expressed a  
252 panel of unique transcripts induced by type I interferon (IFN), important for modulating host  
253 responses to viral pathogens (*Ifitm2*, *Ifitm3*, *Ifitm6*, *Ifi2712a*)<sup>46</sup> (Figure 5A), as well as genes that  
254 constrain inflammation (*Cd300a*, *Nr4a1*, *Lst1*) (Figure 4A and Supplemental Table 5). This dual  
255 immune signature was similar to that seen in Mac II and III, emphasizing the importance of a finely  
256 tuned inflammatory response in the developing lung.

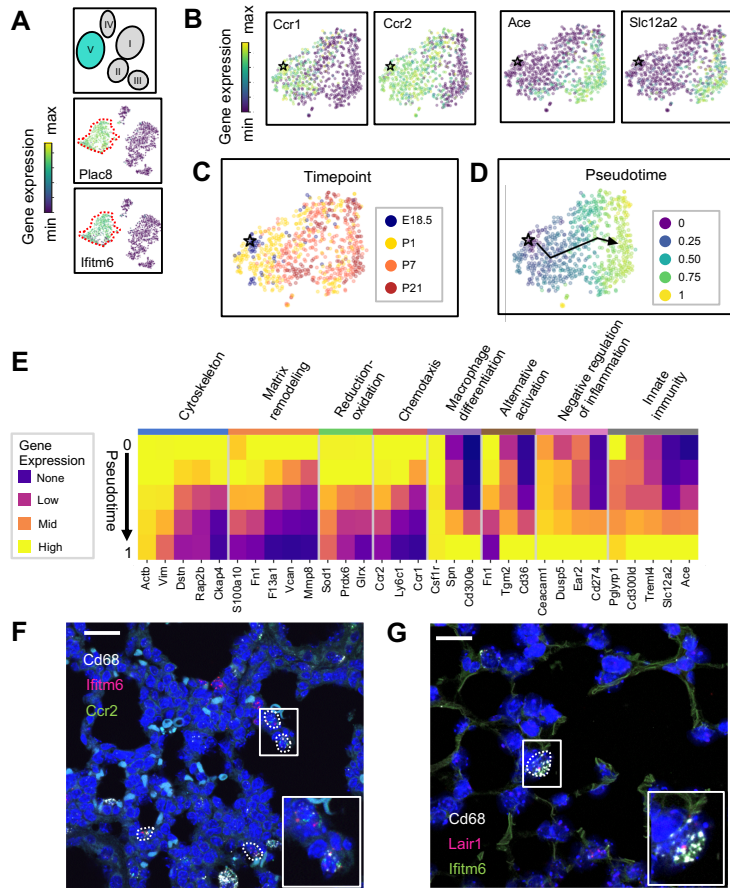

**Figure 5: The Mac V cluster harbors distinct subpopulations with developmentally regulated gene expression patterns.** (A) t-SNE plots demonstrating high expression of *Plac8* and *Ifitm6* in Mac V cells. (B) t-SNE plots of *Ccr1*, *Ccr2*, *Ace*, and *Slc12a2* suggesting the presence of two transcriptionally distinct populations within the Mac V cluster. (C) t-SNE demonstrating a developmental gradient within the Mac V sub cluster. (D) Pseudotime analysis with the star indicating the starting point and the arrow denoting the trajectory across pseudotime. (E) Heatmap of differentially expressed genes within enriched pathways across pseudotime. (F) *In situ* hybridization of *Cd68* (white), *Ifitm6* (red), and *Ccr2* (green), and to detect the “early” Mac V subcluster at P1. (G) *In situ* hybridization of *Cd68* (white), *Lair1* (red), and *Ifitm6* (green), to detect the “late” Mac V subcluster at P21. Calibration bar=20mm for all panels.

257

258 Within Mac V we found a gradient of cell states between two distinct phenotypes, with  
 259 some genes (e.g. *Ccr1* and *Ccr2*) expressed at one end and other genes (e.g. *Ace* and *Slc12a*)  
 260 expressed at the other end of the spectrum (Figure 5B), with a clear correspondence to real  
 261 developmental time (Figure 5C). Pseudotime analysis indicated that cells with an early phenotype  
 262 upregulated *Ly6C*<sup>47</sup>, a gene expressed by classical monocytes, and genes associated with the  
 263 cytoskeleton (*Actb*, *Vim*)<sup>48, 49</sup>, matrix remodeling (*Fn1*, *F13a1*, *Vcan*)<sup>50, 51</sup>, and reduction-oxidation  
 264 (*Sod1*, *Prdx6*)<sup>52, 53</sup> in keeping with the marked physiological changes and rapid remodeling

265 occurring in the lung during the fetal-neonatal transition (Figure 5D and E). Over both pseudo-  
266 and real time, this gene expression pattern evolved into an immunomodulatory signature, reflected  
267 by the up-regulation of genes associated with macrophage differentiation (*Csf1*, *Spn*)<sup>54</sup>,  
268 macrophage polarization (*Tgm2*, *Cd36*)<sup>55</sup>, negative regulation of inflammation (*Ceacam1*, *Ear2*,  
269 *Lair1*)<sup>56</sup>, and innate immunity (*Cd300ld*, *Trem14*)<sup>57</sup>. These data indicate that only the late Mac V  
270 cells are similar to the CD64+ CD16.2+ non-classical monocytes reported by Schyns et. al.<sup>44</sup>, while  
271 the early Mac V cells represent an additional source of heterogeneity unique to the perinatal lung.

272 Spatial localization of the early and late populations by detecting either *Ccr2* or *Lair1* in  
273 combination with *Ifitm6* and *Cd68*, allowed the identification of early Mac V cells within the distal  
274 lung parenchyma (Figure 5F, Supplemental Figure 4B). Of note, these *Cd68+* *Ifitm6+* *Ccr2+* cells  
275 were reliably found either along the secondary crests or lining the developing alveoli such that one  
276 boundary of the cell was always in contact with the airspace. Despite significant changes in the  
277 gene expression, *Cd68+* *Ifitm6+* *Lair1+* were similarly found in the distal lung along the alveolar  
278 walls (Figure 5G). Taken together, these data demonstrate that within the Mac V monocytic  
279 phenotype there are functionally distinct, developmentally dynamic cell states that transition  
280 during and after birth from tissue remodeling and regulation of immune cell chemotaxis to  
281 immunomodulation and pathogen defense.

282

### 283 **Variations in macrophage Fc receptor expression**

284 Fc receptors serve as an important link between cellular and humoral immunity by bridging  
285 antibody specificity to effector cells<sup>58</sup> and are therefore a key axis of functional heterogeneity  
286 within macrophages and monocytes. We evaluated their expression across Mac I-V and found  
287 specific patterns (Supplemental Figure 5). Both *Fcgr3* (encoding FcγRIII) and *Fcer1g* (FcεRIγ)  
288 were widely expressed by all five clusters, while *Fcer1a* and *Fcer2a* were not expressed by any  
289 cluster. Expression of *Fcgr1*, a high affinity receptor for IgG important for the endocytosis of  
290 soluble IgG, phagocytosis of immune complexes, and delivery of immune complexes to APC<sup>59</sup>  
291 was highly expressed by Mac I and Mac IV, and in the early subcluster of Mac V. In contrast,  
292 *Fcgr4*, encoding an Fc receptor able to bind IgE that promotes allergic lung inflammation was  
293 highly expressed by the late sub-cluster of Mac V, in agreement with data from adult mice<sup>44, 60, 61</sup>.  
294 *Fcgrt*, encoding the neonatal Fc receptor (FcRn), an Fc receptor with a key role in IgG recycling,  
295 was highest in Mac IV cells .

296

297 **Dendritic cell subtypes and granulocytes are primed for rapid pathogen response.**

298 Dendritic cells (DCs) play multiple roles in the immune system including antigen  
299 presentation and regulation of tolerance and can be distinguished from other mononuclear  
300 phagocytes by the expression of *Zbtb46*<sup>62</sup> and *Flt3*<sup>63</sup>. We found three clusters of cells, DC I-III,  
301 (Figure 6A and Supplemental Tables 6-8) expressing *Zbtb46* and *Flt3* (Supplemental Figure 6A).  
302 DC I cells expressed *Itgae* or CD103 (Figure 6B), which promotes antiviral immunity and may  
303 confer the ability for antigen cross-presentation<sup>64</sup>. DC II expressed *Cd209a* or DC-SIGN, a gene  
304 found in monocyte-derived inflammatory DC exposed to lipopolysaccharide<sup>65</sup>. DC III expressed  
305 melanoregulin (*Mreg*), a modulator of lysosomal hydrolase maturation<sup>66</sup> (Figure 6B). *Mreg* had  
306 not been previously identified as a marker for DC subsets, hence we examined other genes  
307 expressed by DC III and identified *Cacnb3*, a voltage dependent Ca<sup>2+</sup> channel found in stimulated  
308 Langerhans cells<sup>67</sup>; *Fscn1*, which contributes to dendrite formation in maturing DC<sup>68</sup>; *Ccl5*, an  
309 important chemoattractant for DC and T cells; and *Ccr7*, a chemokine receptor associated with  
310 trafficking to the draining lymph node<sup>69</sup> (Supplemental Figure 6B and Supplemental Tables 6-8).

311 Quantification of the relative abundances identified DC I as the predominant population in  
312 the embryonic lung. DC I persisted postnatally to comprise between 1-2% of total lung immune  
313 cells (Figure 6C). DC II was present at low frequency during the first week of life and increased  
314 in abundance by P21. DC III was undetectable before birth and became more abundant postnatally.  
315 Taken together, these data suggest DC I comprises migratory DCs, DC II cells are related to  
316 monocyte-derived DCs, and DCIII is a minority subtype of mature DCs.

317 Mast cells and basophils are similar in development and function and serve as fast  
318 responders to specific immune challenges<sup>70</sup>. Two immune clusters highly expressed *Cpa3* that  
319 could be further distinguished as mast cells and basophils by the expression of *Mcpt4* and *Mcpt8*,  
320 respectively<sup>71, 72</sup> (Figure 6D). Mast cells expressed *Tpsb2*, which is secreted upon bacterial  
321 challenge<sup>73</sup>, and the peptidases chymase (*Cma1*) and tryptase (*Tspab1*) (Supplemental Tables 9).  
322 Lung resident basophils express a unique signature distinct from circulating basophils and play a  
323 key role in promoting AM differentiation<sup>74</sup>. Our basophils generally shared expression of many  
324 genes with lung resident basophils, including *Il6*, *Hgf*, *Ccl4* and *Osm* (Figure 6E, Supplemental  
325 Table 10). We also identified a neutrophil cluster distinguished by expression of *SI00a8* and  
326 *SI00a9*, which are released during inflammation<sup>75</sup>, and *Stfa1* and *Stfa2*, cysteine proteinase

327 inhibitors important for antigen presentation<sup>76</sup> (Figure 6F and Supplemental Table 11). Our data  
 328 agree with prior work demonstrating that lung resident basophils express signaling molecules  
 329 important for interaction with neighboring cells<sup>74</sup>, and that mast cells and neutrophils are primed  
 330 for rapid innate immune responses upon pathogen challenge.

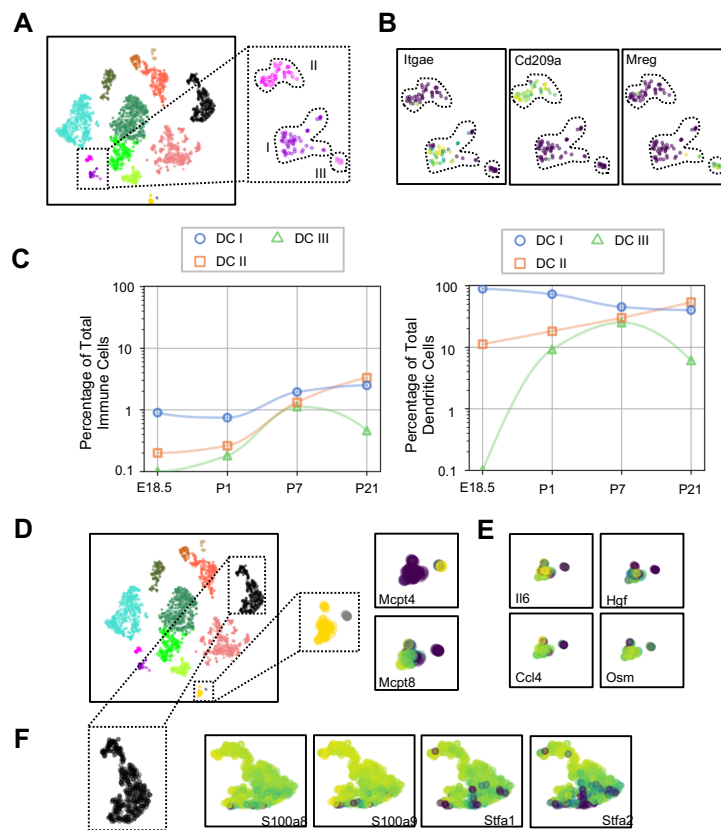

**Figure 6: Multiple dendritic cell populations and lung granulocytes are primed for rapid pathogen response.** (A) Colored schematic and lung immune cell clustering demonstrating three separate clusters of DCs. (B) tSNE plots of genes discriminating the three DC subclusters including *Itgae* (DCI), *Cd209a* (DCII) and *Mreg* (DCIII). (C) Quantification of specific DC subpopulations relative to total immune cells (left) or total DC (right). (D) Colored schematic and lung immune cell clustering demonstrating the basophil, mast cell and neutrophil clusters, with high magnification of basophil and mast cell clusters and t-SNE plots of *Mcpt4* and *Mcpt8*. (E) t-SNE plots of *Il6*, *Hgf*, *Ccl4*, and *Osm* in the basophil cluster. (F) High magnification of the neutrophil cluster with t-SNE plots of neutrophil specific genes *S100a8*, *S100a9*, *Sifa1*, and *Sifa2*.

### 332 Naïve lymphocytes populate the lung at birth.

333 Lymphocytes including ILC2s (expressing *Areg*), NK cells (*Gzma*), B cells (*Ms4a1*) and  
 334 T cells (*Cde3*) were present in the lung at low frequencies (approximately 2% of immune cells)  
 335 prior to birth and increased in frequency after birth. By P21 lymphocytes comprised 60% of total



336 immune cells (Figure 1F and G), with B cells representing 30% and T cells 15% of the total (Figure  
 337 7A).

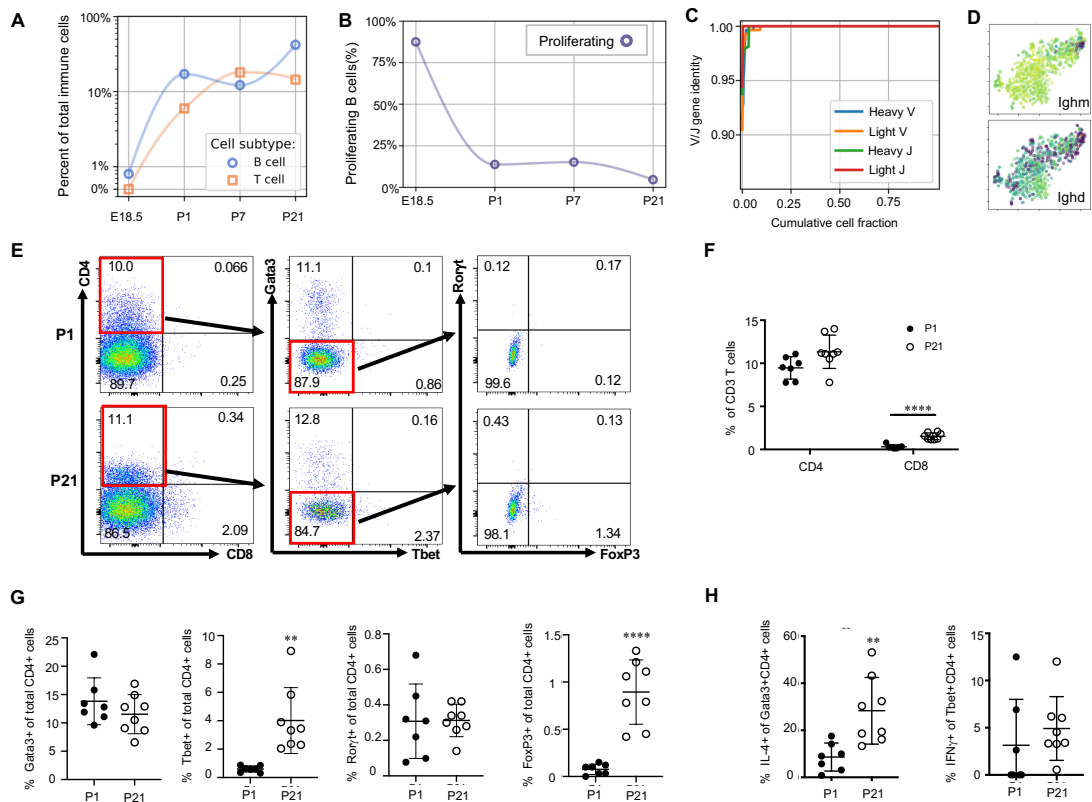

**Figure 7: Lymphocytes populate the lung at birth but remain naïve during the first three weeks of life.** (A) Quantification of the abundance of B and T cells at each developmental timepoint expressed on a  $\log_{10}$  scale as percentage of total immune cells. (B) Quantification of the percentage of proliferating B cells at each developmental timepoint. (C) B cell heavy and light variable (V) and joining (J) gene identity and their cumulative cell fraction. (D) t-SNE plot of *Ighm* and *Ighd*. (E-H) At P1 (n=7 mice) and P21 (n=8 mice), lungs were processed to a single-cell suspension, and flow cytometry was used to assess frequencies of (F) CD4+CD3+ and CD8+CD3+ T cells, (G) Gata3+, Tbet+, Ror $\gamma$ t+ and Foxp3+ CD4+ T cells, and (H) IL-4-producing Gata3+CD4+ T cells or IFN $\gamma$ -producing Tbet+CD4+ T cells. Data shown as mean  $\pm$  SD, \*\* $P$  < 0.01, \*\*\*\* $P$  < 0.00001 by Student's  $t$  test.

338

339 B cells in the embryonic lung were rare and the majority expressed proliferation markers.

340 After birth, B cell abundance increased, but the proliferating fraction decreased (Figure 7B). The

341 cumulative distribution of V and J loci germline similarity revealed no somatic hypermutation

342 (Figure 7C) and most B cells expressed *Ighm* and *Ighd* indicative of an IgM isotype (Figure 7D).

343 Few B cells expressed activation markers (e.g. *Aicda*, *Tbx21*, *Prdm1*, and *Ebi3*, Supplemental

344 Figure 7B)<sup>77-80</sup>, suggesting that most postnatal B cells remain naïve through late alveolarization.

345 To test the clonality of the B cell repertoire at birth, we assembled the heavy and light chain loci

346 and performed t-SNE on a feature-selected transcriptome limited to over-dispersed genes in B  
347 cells. Proliferating cells clustered together but candidate clonal families did not, suggesting  
348 primarily homeostatic B cell proliferation rather than clonal expansion<sup>81</sup>.

349 The majority of T cells expressed *Trac*, suggesting  $\alpha\beta$  identity, with a few *Trac*- cells  
350 expressed *Tcrg-C4*, suggesting  $\gamma\delta$  T cell identity (Supplemental Figure 7C). T cell receptor  
351 diversity showed no sign of clonal expansion (data not shown). Outside the thymus,  $\alpha\beta$  T cells are  
352 usually either CD4<sup>+</sup> (with subgroups Tbet<sup>+</sup> or T helper (Th) 1, Gata3<sup>+</sup> or Th2, and FoxP3<sup>+</sup> or  
353 Th17) or CD8<sup>+</sup>, however we characterized T cell heterogeneity in neonatal lungs by flow  
354 cytometry and found that 85-90% of CD3<sup>+</sup> cells were CD4<sup>-</sup> CD8<sup>-</sup> at both P1 and P21 (Figure 7E),  
355 confirming an earlier report suggesting this is a neonatal-specific phenotype. mRNA expression  
356 analysis qualitatively confirmed this finding (Supplemental Figure 7D). The frequency of total T  
357 cells was similar at P1 and P21 (Supplemental Figure 7E), however several T cell subsets (CD8<sup>+</sup>,  
358 CD4<sup>+</sup> Th1, and Treg cells) increased by P21 while other subsets remained constant (Figure 7F and  
359 G). In response to stimulation with phorbol myristate acetate (PMA) and ionomycin, a greater  
360 number of CD4<sup>+</sup> Th2 cells at P21 produced IL-4 as compared to P1 ( $28.3 \pm 19.7$  vs.  $8.6 \pm 5.7$ ,  
361  $P=0.0047$ ) (Figure 7H). Few CD4<sup>+</sup> Th1, Treg, and Th17 cells produced IFN $\gamma$ , IL-10, IL-17 upon  
362 stimulation, at both P1 and P21 (Figure 7H, Supplemental Figure 7F).

## 363 Discussion

364 At birth, the lung undergoes marked physiological changes as it transitions from a fluid-  
365 filled, hypoxic environment to an air-filled, oxygen-rich environment. How these changes affect  
366 immune populations during this transition and the ensuing period of rapid postnatal lung growth  
367 remains unclear. Our study demonstrates a rapid increase in immune cell heterogeneity, especially  
368 within macrophages and monocytes. We identified five macrophage subpopulations, each  
369 expressing a specific gene signature, spatial localization, and putative functions. Mac I, the  
370 predominant immune cell present just before birth, were highly proliferative, enriched for tissue  
371 remodeling and angiogenesis genes, and completely encircled small blood vessels, suggesting a  
372 previously unrecognized role for lung macrophages in modulating lung vascular growth or  
373 remodeling during development. During the first week of life a transitory population (Mac II)  
374 emerged from Mac I and later disappeared, transitioning into either an alveolar (Mac III) or Mac  
375 IV macrophage phenotype. One macrophage population (Mac IV) expressed complement proteins

376 and other antibacterial molecules. Another interstitial population (Mac V) expressed antiviral  
377 molecules and spanned a gradient between two extreme phenotypes, one that expressed high levels  
378 of homeostatic genes during early postnatal development, and a second with immunomodulatory  
379 function that resembles previously reported nonclassical monocytes. Lymphocytes increased in  
380 abundance from almost zero before birth to more than half of lung immune cells by P21, but  
381 maintained a naive phenotype skewed toward type II immunity and with predominantly Cd4- Cd8-  
382 T cells.

383         This comprehensive study has far-reaching implications for lung biology. Resident tissue  
384 macrophage populations are established during development, wherein progenitors undergo  
385 differentiation guided by the tissue-specific microenvironment<sup>82</sup>. However, definitive data  
386 regarding the full complexity of lung resident macrophages and monocytes, their specific roles  
387 and functions, and how they change across development remain elusive. Although the advent of  
388 single cell transcriptomics has provided increased resolution to detect previously unrecognized  
389 immune cell populations, consensus regarding the diversity and function of lung resident  
390 macrophages has not been achieved. Cohen et al. recently performed single cell transcriptomics of  
391 the developing mouse lung from E12.5 until P7<sup>74</sup>, and identified a total of three macrophage  
392 populations, and one population of resident monocytes, with alveolar macrophages representing  
393 the sole macrophage population present in the lung after P7. In contrast, Schyns et al. identified  
394 two distinct interstitial macrophages in the adult lung, and a population of nonclassical monocytes  
395 in addition to alveolar macrophages<sup>44</sup>. Although our results are more consistent with the report of  
396 Schyns et al, there are a number of key differences. First, the total heterogeneity in the perinatal  
397 lung far exceeds the adult lung, with the presence of two unique macrophage clusters (Mac I and  
398 Mac II and a unique monocyte derived cluster (early Mac V). Second, both the Mac IV and Mac  
399 V cluster harbor significant internal heterogeneity (in the case of Mac V, corresponding to  
400 developmental time) that cannot be easily split into transcriptionally distinct “subclusters”. The  
401 cells within Mac IV appear similar to the CD206+ and CD206- macrophage populations reported  
402 by Schyns et al. Although in the Schyns report those populations were reported to be distinct  
403 clusters, there was significant overlap in gene expression between the two, more consistent with  
404 our data suggesting these are not separate populations but rather a phenotypic continuum. *In situ*  
405 validation confirmed the presence of all five subpopulations and localized each to defined locations  
406 in the lung including the alveolar lumen, around vessels and airways, or within the distal lung

407 interstitium. A greater understanding of macrophage and monocyte function at birth provides an  
408 essential framework for interpreting how lung injury and developmental defects alter specific  
409 immune subpopulations and eventually influence lung growth and development.

410 Another key finding in our study was the unexpected presence of embryonic lung  
411 macrophages encircling small blood vessels. Vascular growth is a key driver of distal lung growth  
412 during the late saccular and alveolar stages of development<sup>83</sup>. Macrophages support angiogenesis  
413 in other organs, promoting blood vessel formation or expansion, providing survival and migratory  
414 cues to endothelial cells, and facilitating bridging of vascular sprouts<sup>84</sup>. In the developing  
415 hindbrain, macrophages are in close contact with endothelial cells, serving to promote vascular  
416 anastomosis<sup>85</sup>. Similarly, in the developing retinal vasculature, microglia connect adjacent  
417 endothelial tips cells to increase vascular plexus complexity<sup>9</sup>. These embryonic bridging  
418 macrophages secrete numerous genes shared by the perivascular macrophages that drive tumor  
419 angiogenesis including the angiopoietin receptor, *Tek*, the VEGF co-receptor *Nrp1*, growth factors  
420 (*Fgf2*, *Pgf*) and MMPs (*Mmp2*, *Mmp9*). Although the perivascular macrophages we observed in  
421 the embryonic lung expressed low levels of *Nrp1*, they appear distinct from the macrophages that  
422 influence retinal and hindbrain angiogenesis, expressing a unique set of ECM remodeling and  
423 angiogenic genes, including genes that may modulate vascular tone and permeability. The  
424 distinctive location of these macrophages and their gene signature imply a role in vascular  
425 development. Furthermore, these encircling macrophages disappeared after birth, suggesting a  
426 function temporally restricted to prenatal development. Future studies to selectively target this  
427 subpopulation will be required to further establish their function and to delineate the signals  
428 responsible for the cessation of the macrophage-vascular interaction after birth.

429 During embryonic development, the lung is populated by separate populations of erythroid-  
430 myeloid progenitors originating from the yolk-sac and fetal liver, prior to the emergence of  
431 circulating monocytes and hematopoietic stem cells. Some existing data suggest that the early  
432 yolk sac derived macrophages are eventually entirely replaced by fetal liver derived macrophages  
433 capable of self-renewal<sup>86</sup>. In our study, we observed a broad division of the five macrophage  
434 populations based upon expression of *Dab2* and *Plac8*, evident both before and after birth.  
435 However, expression of genes that characterize yolk sac- and fetal liver-derived macrophages at  
436 earlier stages of development were dispersed among all five populations<sup>25</sup>. These data are  
437 consistent with prior work suggesting that imprinting from signals in the tissue microenvironment

438 is the dominant factor regulating macrophage phenotype<sup>87</sup>. The additional contribution of bone  
439 marrow derived monocytes to replenish lung macrophages under homeostatic conditions also  
440 remains debated<sup>88</sup>. High expression of *Ly6C* and *Ccr2* observed in early Mac V cells is reminiscent  
441 of the infiltrating monocytes that continuously replenish intestinal macrophages, indicating that  
442 both early and late Mac V cells are monocytes or monocyte-derived<sup>89</sup>. Future experiments  
443 exploiting lineage tracing technologies at perinatal time points are warranted to determine the  
444 amount of extravasating blood-derived versus self-sustaining tissue-resident monocytes at this  
445 crucial time.

446 Our data also revealed three distinct dendritic cell populations with transcriptional  
447 signatures indicative of migratory, inflammatory, and a mature dendritic cell phenotypes,  
448 respectively. Moreover, we identified distinct (*Itgae* and *Cd209a*) and novel (*Mreg*) markers  
449 superior to classical markers (*Zbtb46* and *Flt3*) to distinguish dendritic subpopulations in the  
450 postnatal lung. Functionally, both *Itgae* and *Cd209a*/DC-SIGN can induce T cell immunity<sup>90, 91</sup>,  
451 suggesting that lung DCs immediately post-birth should be able to cause an effective adaptive  
452 immune response.

453 Despite the apparent signaling readiness of antigen-presenting DCs, T and B cell  
454 compartments showed an overall naive and rarely proliferative phenotype, lacking any clonal  
455 structure and with most  $\alpha\beta$  T cells double negative (DN) for both Cd4 and Cd8, key signaling  
456 components for cell-mediated immunity. Though consistent with prior evidence showing a high  
457 proportion of pulmonary lymphocytes with unconventional phenotypes<sup>92</sup>, the observation of  
458 widespread DN T cells points to a yet undetermined function, perhaps related to specific  
459 immunoregulatory functions during infectious disease<sup>93</sup>.

460 In summary, these data highlight the marked increase in immune cell diversity after birth,  
461 with a developmental plasticity that provides distinct immune populations to fill specific roles in  
462 tissue and vascular remodeling, immunoregulation, and bacterial and viral pathogen defense.  
463 Injuries to the developing, immature lung can have profoundly untoward and life-long  
464 consequences as a significant component of lung parenchymal and vascular development occurs  
465 during late pregnancy and the first few years of postnatal life. Many of these injurious stimuli  
466 including acute infection, hyperoxia, and corticosteroids are known to have significant effects on  
467 immune cell phenotype and function. Therefore, our data provide a detailed framework that  
468 enables a more complete understanding of how disruptions of immune cell phenotype may

469 contribute to altered lung development, both through the induction of pathologic, pro-  
470 inflammatory signaling as well as the suppression of essential homeostatic functions. Further, a  
471 deep understanding of the diversity of immune cell functions during this important window of  
472 postnatal development, and how specific immune cell phenotypes are regulated could allow for  
473 the application of immunomodulatory therapies as a novel strategy to preserve or enhance lung  
474 development in infants and young children.

## 475 **Acknowledgements**

476 We thank Sai Saroja Kolluru (Stanford University) for assistance with library submission to the  
477 Chan Zuckerberg Biohub , Yuan Xue (Stanford University) for assistance with the initial single  
478 cell RNA-seq data acquisition, Astrid Gillich for technical support with the RNAscope  
479 experiments, and Maya Kumar for providing hydrazide. We thank Henry Hampton for his input  
480 and fruitful discussions. We also thank the Stanford Shared FACS Facility, Lisa Nichols, Meredith  
481 Weglarz, and Tim Knaak for assistance with the flow cytometry instrumentation and antibody  
482 panel design. Flow cytometry data was collected on an instrument in the Stanford Shared FACS  
483 Facility obtained using NIH S10 Shared Instrument Grant (S10RR027431-01). This work was  
484 supported by National Institutes of Health grants HL122918 (CMA), HD092316 (CMA, DNC),  
485 the Stanford Maternal Child Health Institute Tashia and John Morgridge Faculty Scholar Award  
486 (CMA), the Stanford Center of Excellence in Pulmonary Biology (DNC), Bill and Melinda Gates  
487 Foundation (SRQ), and the Chan Zuckerberg Biohub (DNC. and SRQ). MAS is supported by the  
488 NSF-GRFP.

## 489 **Author Contributions**

490 R.D.-G., C.M.A., F.Z., X.C., S.R.Q., and D.N.C. designed the experiments, interpreted the data,  
491 and wrote or edited the manuscript. R.D.-G., X.C., M.L., and R.C.J. performed the experiments.  
492 R.D.G., X.C., and F.Z. prepared the sequencing libraries. F.Z. analyzed the transcriptomic data.  
493 M.A.S. assembled the B and T cell repertoires. All authors edited and approved the final version  
494 of the manuscript.

495

## 496 **Competing Interests:**

497 None of the authors have competing interests to declare.

498 **Methods**

499 **Mouse lung cell isolation.** C57BL/6 mice were obtained from Charles River Laboratories. For  
500 studies using E18.5, P1, and P7 murine lungs, pregnant dams were purchased, and pups aged prior  
501 to lung isolation. At E18.5, dam was asphyxiated with CO<sub>2</sub> and pups extracted. At P1, P7, and  
502 P21 pups were euthanized with euthanasia solution (Vedco Inc.). Genetic sex of mice at  
503 developmental stages E18.5 and P1 was determined by performing PCR amplification of the Y  
504 chromosome gene Sry. P7 and P21 mice were sexed through identification of a pigment spot on  
505 the scrotum of male mice<sup>94</sup>. For all timepoints, except E18.5, the pulmonary circulation was  
506 perfused with ice cold heparin in 1x PBS until the circulation was cleared of blood. Lungs were  
507 minced and digested with Liberase (Sigma Aldrich) in RPMI for 15 (E18.5, P1, and P7) or 30  
508 (P21) minutes at 37C, 200 rpm. Lungs were manually triturated and 5% fetal bovine serum (FBS)  
509 in 1x PBS was used to quench liberase solution. Red blood cells were lysed with 1x RBC lysis  
510 buffer (Invitrogen) as indicated by the manufacturer and total lung cells counted on Biorad cell  
511 counter (BioRad).

512

513 **Immunostaining and fluorescence-activated cell sorting (FACS) of single cells.** Lungs were  
514 plated at 1x10<sup>6</sup> cells per well and stained with Fc block (CD16/32, 1:100, Tonbo Biosciences) for  
515 30 min on ice. Cells were surface stained with the endothelial marker CD31 (1:100, clone:  
516 MEC3.1, eBiosciences), epithelial marker Epcam (1:100, clone: CD326, eBiosciences), and  
517 immune marker CD45 (1:100, clone: F11, eBiosciences) for 30 min on ice. The live/dead dye,  
518 Sytox Blue (Invitrogen), was added to cells and incubated for 3 min prior to sorting into 384-well  
519 plates (Bio-Rad Laboratories, Inc) using the Sony LE-SH800 cell sorter (Sony Biotechnology Inc).  
520 FACS sorts were performed with a 100 μm sorting chip (Catalog number: LE-C3110). Prior to  
521 cell sorting, the cell sorter and chip were calibrated with SH800 setup beads. Droplet targeting into  
522 the middle of four corner and center wells of 384-well plates was manually calibrated. Single color  
523 controls were used to perform fluorescence compensation and generate sorting gates. The 384-  
524 well plates pre-loaded with lysis buffer (Triton X-100 solution, dNTP, poly dT, RNase inhibitor,  
525 ERCC, and Triton X-100) were loaded onto the Sony SH800 for gated single cell capture using  
526 the ultra-purity mode. Following completion of sorting, 384-well plates containing single cells  
527 were spun down, immediately placed on dry ice, and stored at -80C.

528

529 **cDNA library generation using Smart-Seq2.** Complementary DNA from sorted cells was  
530 reverse transcribed and amplified using the Smart-Seq2 protocol on 384-well plates as previously  
531 described<sup>20, 95</sup>. Concentration of cDNA was quantified using picogreen (Life technology corp.) to  
532 ensure adequate cDNA amplification. In preparation for library generation, cDNA was normalized  
533 to 0.4 ng/uL. Tagmentation and barcoding of cDNA was prepared using in-house Tn5 transposase  
534 and custom, double barcoded indices<sup>96</sup>. Library fragment concentration and purity were quantified  
535 by Agilent bioanalyzer. Libraries were pooled and sequenced on Illumina NovaSeq 6000 with  
536 2x100 base kits and at a depth of around 1 million read pairs per cell.

537

538 **Data analysis and availability.** Sequencing reads were mapped against the mouse genome  
539 (GRCm38) using [STAR aligner](#)<sup>97</sup> and gene were counted using [HTSeq](#)<sup>98</sup>. FZ has been the main  
540 maintainer of HTSeq for several years. To coordinate mapping and counting on Stanford's high-  
541 performance computing cluster, [snakemake](#) was used<sup>99</sup>. Gene expression count tables were  
542 converted into loom objects (<https://linnarssonlab.org/loompy/>) and cells with less than 100,000  
543 uniquely mapped counts were discarded. Counts for the remaining cells were normalized to counts  
544 per million reads. For t-distributed stochastic embedding (t-SNE)<sup>22</sup>, 500 features were selected that  
545 had a high Fano factor in most mice, and the restricted count matrix was log-transformed with a  
546 pseudocount of 0.1 and projected onto the top 25 principal components using [scikit-learn](#)<sup>100</sup>.  
547 Unsupervised clustering was performed using [Leiden](#) (C++/Python implementation)<sup>21</sup>. Custom  
548 Python 3 scripts were used for specific analyses and are available at  
549 <https://github.com/iosonofabio/lungsc>. T Cell receptors were assembled using TraCeR<sup>101</sup> using the  
550 default parameters of the Singularity image. B cell receptors were assembled using BraCeR<sup>102</sup> with  
551 the parameter `-IGH_networks`, which agreed with our in-house pipeline consisting of Basic<sup>103</sup> and  
552 Change-O<sup>104</sup>. Raw fastq files, count tables, and metadata are available on NCBI's Gene Expression  
553 Omnibus (GEO) website (GSEXXXXX).

554

555 **In-situ validation using RNAscope and immunofluorescence (IF).** Embryonic and post-natal  
556 mice were euthanized as described above. E18.5 lungs were immediately placed in 10% neutral  
557 buffered formalin following dissection. P1, P7, and P21 murine lungs were perfused as described  
558 above, and P7 and P21 lungs inflated with 2% low melting agarose (LMT) in 1xPBS, and placed  
559 in 10% neutral buffered formalin. Following 20 hours incubation at 4C, fixed lungs were washed



560 twice in 1xPBS and placed in 70% ethanol for paraffin-embedding. In situ validation of genes  
561 identified by single cell RNA-seq was performed using the RNAscope Multiplex Fluorescent v2  
562 Assay kit (Advanced Cell Diagnostics) and according to the manufacturer's protocol. Formalin-  
563 fixed paraffin-embedded (FFPE) lung sections (5  $\mu$ m) were used within a day of sectioning for  
564 optimal results. Nuclei were counterstained with DAPI (Life Technology Corp.) and extracellular  
565 matrix proteins stained with hydrazide<sup>105</sup>. Opal dyes (Akoya Biosciences) were used for signal  
566 amplification as directed by the manufacturer. Images were captured with Zeiss LSM 780 and  
567 Zeiss LSM 880 confocal microscopes, using 405nm, 488nm, 560nm and 633nm excitation lasers.  
568 For scanning tissue, each image frame was set as 1024x1024 and pinhole 1AiryUnit (AU). For  
569 providing Z-stack confocal images, the Z-stack panel was used to set z-boundary and optimal  
570 intervals, and images with maximum intensity were processed by merging Z-stacks images. For  
571 all both merged signal and split channels were collected.

572

573 **Intracellular Flow Cytometry.** P1 and P21 male and female murine lungs were isolated as  
574 described above. Cells were blocked for 30 minutes with CD16/CD32 (Tonbo Biosciences). For  
575 intracellular analyses, cells were stimulated with PMA (50 ng/ml, Sigma-Aldrich), ionomycin (750  
576 ng/mL, Sigma-Aldrich), and GolgiStop (BD Biosciences) for 5 hours, and then surface stained  
577 with fluorochrome-conjugated antibodies for 30 minutes: CD3 (clone: 145-2C11, BD  
578 Biosciences), CD4 (RM4-5, BD Biosciences), and CD8a (clone: 53-6.7, Biolegend). Cells were  
579 then permeabilized with FoxP3 Fixation/Permeabilization Kit (BD Biosciences) as indicated by  
580 the manufacturer, and stained for TBET (clone: 4B10, Biolegend), GATA3 (clone: L50-823, BD  
581 Biosciences), FOXP3 (clone: FJK-16s, eBioscience), ROR $\gamma$ t (clone: Q31-378, BD Biosciences),  
582 IFN $\gamma$  (clone: XMG1.2, Biolegend), IL-4 (clone: 11B11, BD Biosciences), IL-10 (clone: JES5-  
583 16E3, Biolegend), and IL-17 (clone: TC11-18H10, Miltenyi Biotec) for 30 minutes. Cells were  
584 read using an LSRII flow cytometer using FACSDiva software. Flow data was analyzed using  
585 FlowJo (Tree Star Inc.). Flow cytometry analysis for this project was done on instruments in the  
586 Stanford Shared FACS Facility.

587

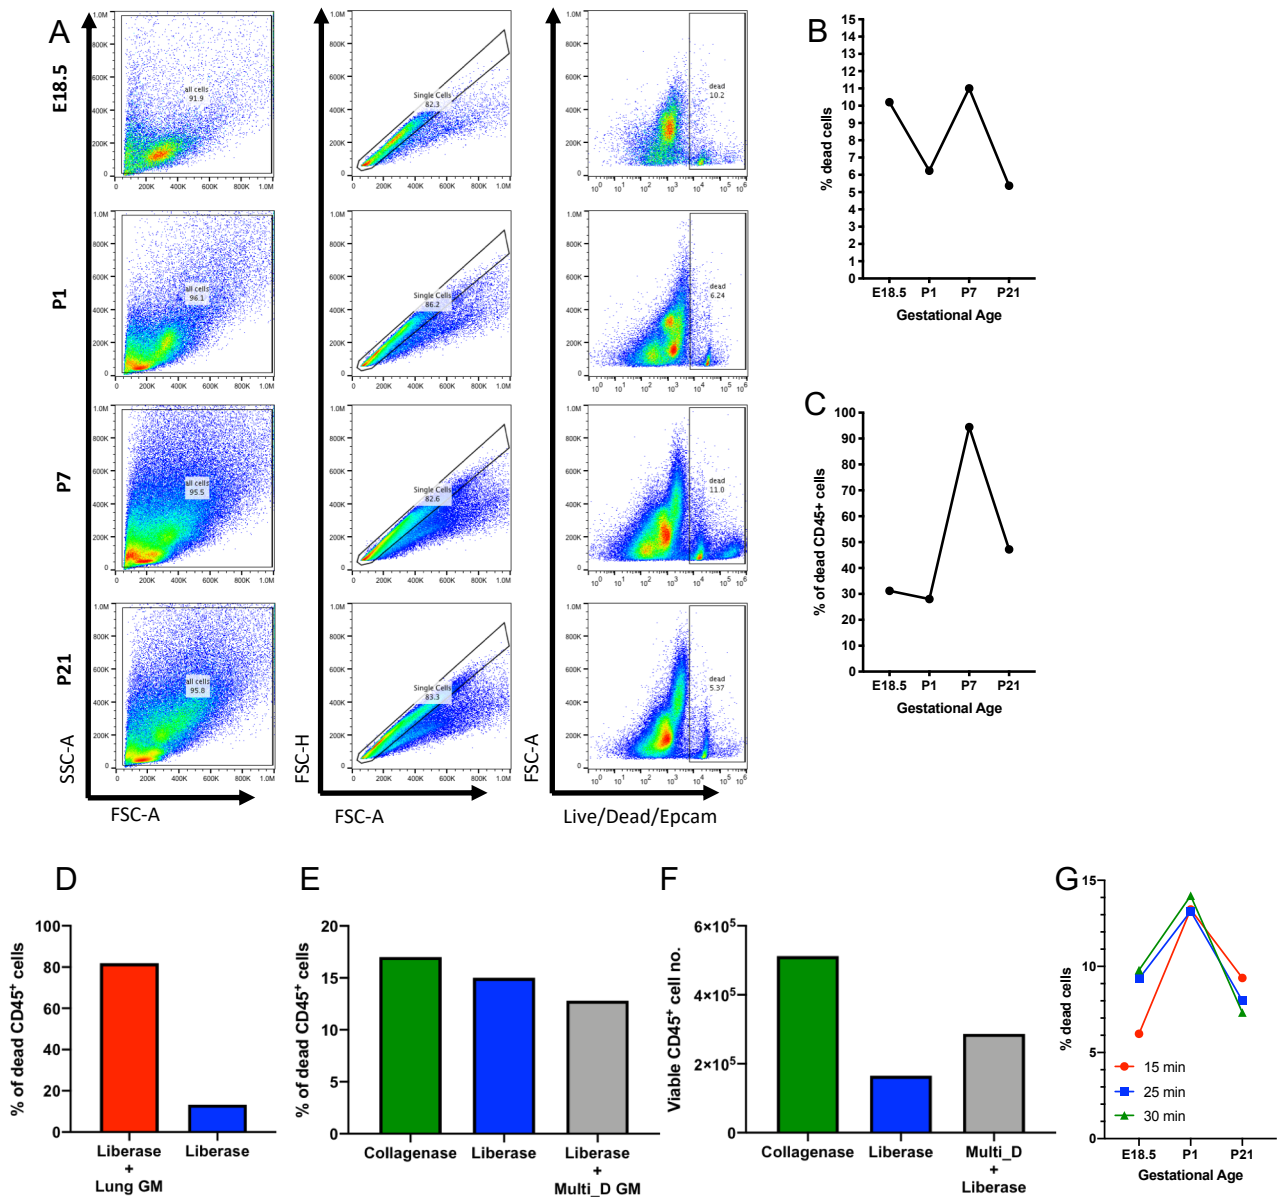

**Supplemental Figure 1. Optimization of lung tissue digestion.** (A-C) E18.5, P1, P7 and P21 murine lungs were processed for flow cytometry and the frequency of (B) total and (C) CD45+ (immune) dead cells was assessed. (D-E) Frequency of dead cells of P7 murine lungs was determined by flow cytometry following 30 minute (D) enzymatic digestion with 0.38 mg/mL liberase with manual tituration (Liberase) and/or mechanical disruption using the lung program on the GentleMACS dissociator (Lung GM) or (E) enzymatic digestion with collagenase and manual tituration (Collagenase), Liberase, or 0.38 mg/mL liberase with the Multi\_D program on the GentleMACS dissociator (Liberase + Multi\_D GM). (F) Number of viable P7 murine lung cells following Collagenase, Liberase, or Liberase + Multi\_D GM was quantified. (G) Frequency of murine lung cells at gestational age E18.5, P1, P21 was quantified following incubation with 0.38 mg/mL liberase for 15, 25, and 30 min and manual tituration.

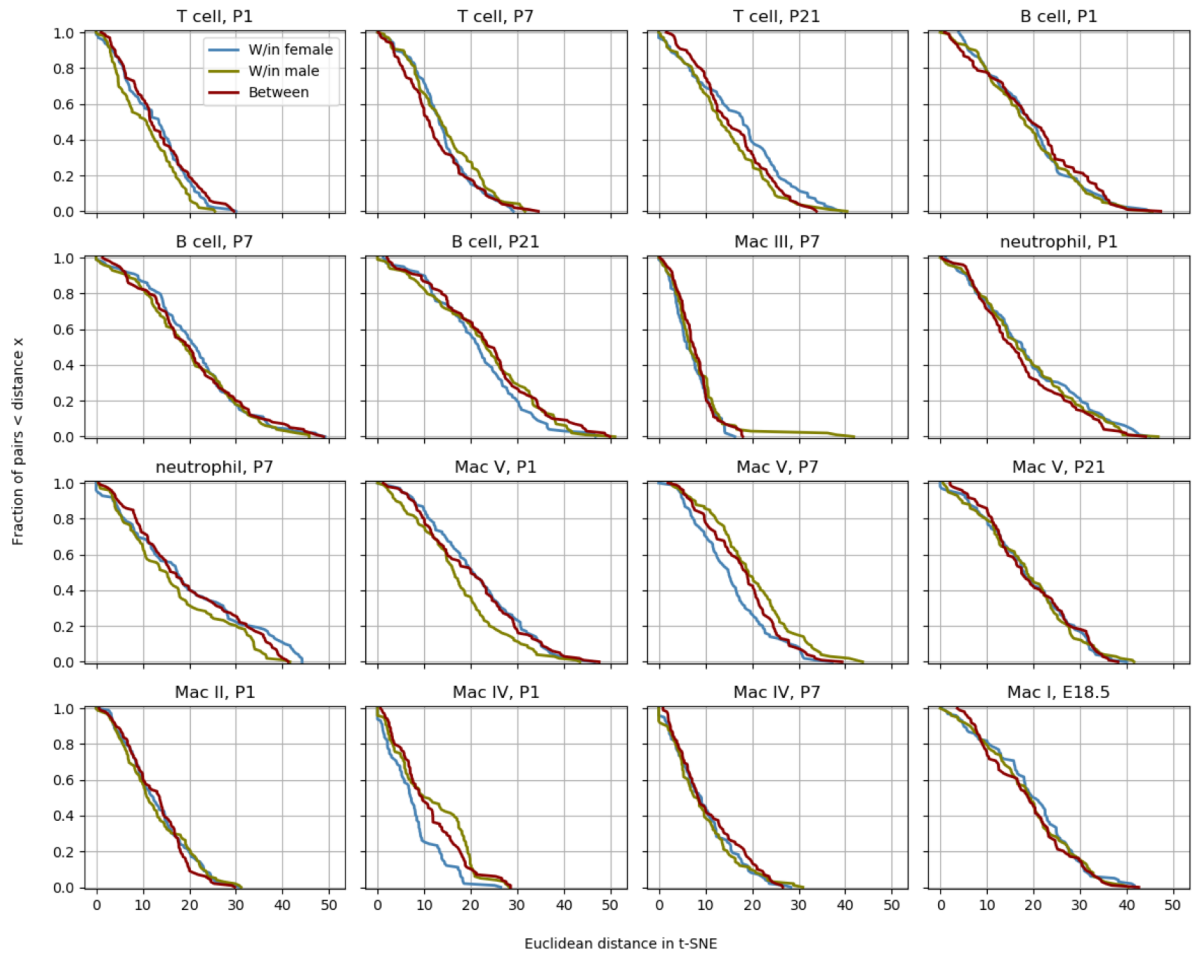

**Supplemental Figure 2. Determination of variation between mice.** To quantify whether the different mice contributed spurious variation to the data, a distribution level approach was chosen. For each cell type and time point, 100 pairs of cells from either the same mouse or between different mice were chosen and the distance in tSNE space calculated. The cumulative distributions for those pairs were subsequently plotted to check whether pairs from different animals had a significantly longer distance than cells from the same mouse.

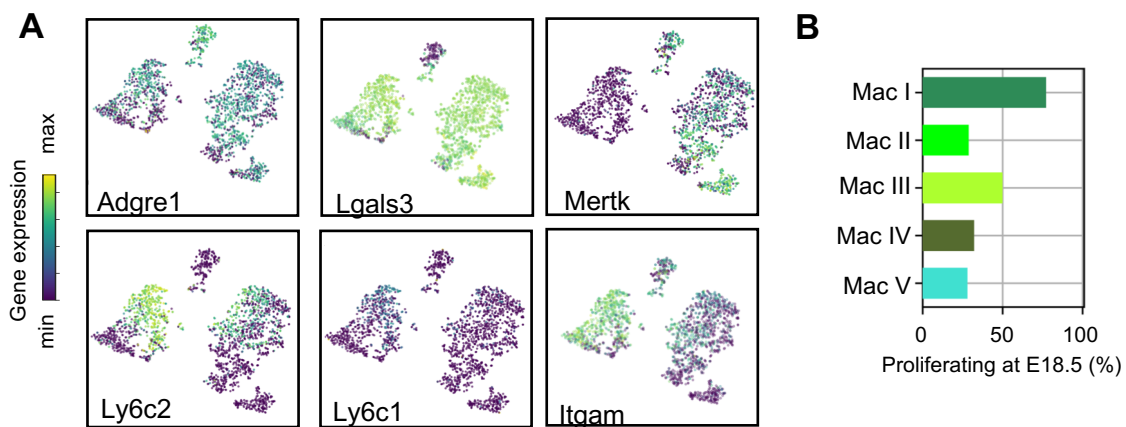

**Supplemental Figure 3. Lineage-defining genes are diffusely expressed across macrophage populations.** (A) Graph of percentage of proliferating macrophages in each cluster at E18.5. (B) t-SNE plots of *Adgre1*, *Lgals3*, *Mertk*, *Ly6c2*, *Ly6c1* and *Itgam* expression across all macrophage clusters between E18.5 and P21.

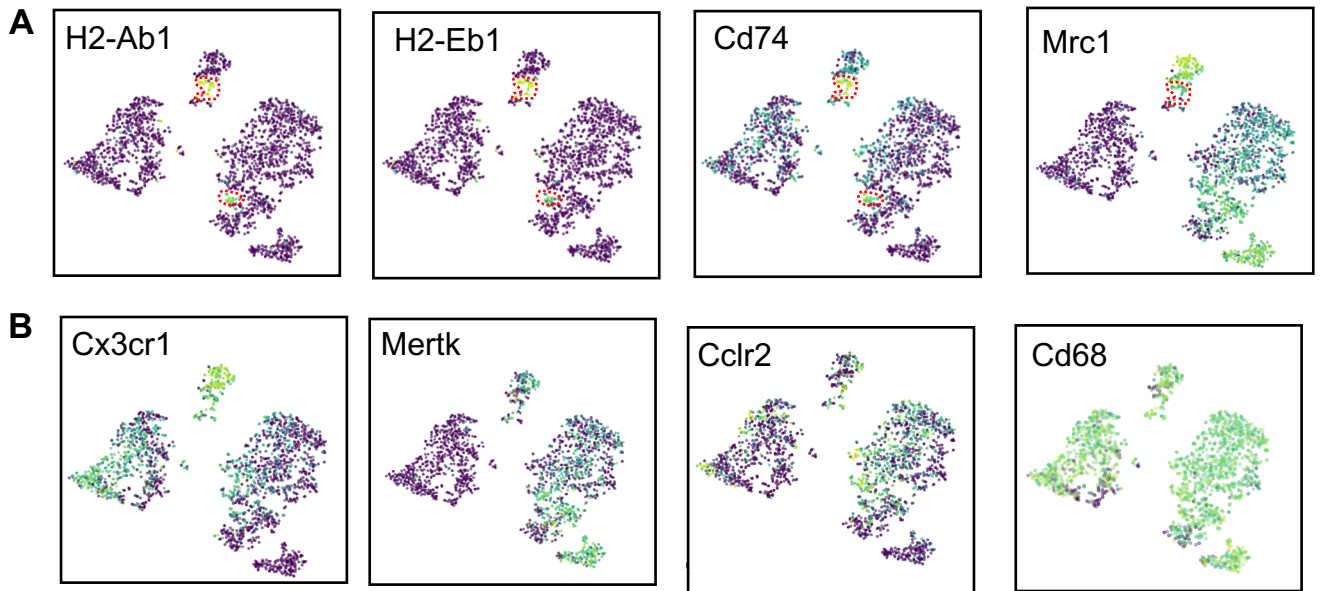

**Supplemental Figure 4. Expression of select genes in Mac IV cluster.** (A) t-SNE plots of *H2-Ab1*, *H2-Eb1*, *Cd74*, and *Mrc1* demonstrating differential expression in a portion of Mac IV (dotted red line). (B) t-SNE plots of *Cx3cr1*, *Mertk*, *Ccl2*, *Cd68* demonstrating diffuse expression throughout Mac IV.

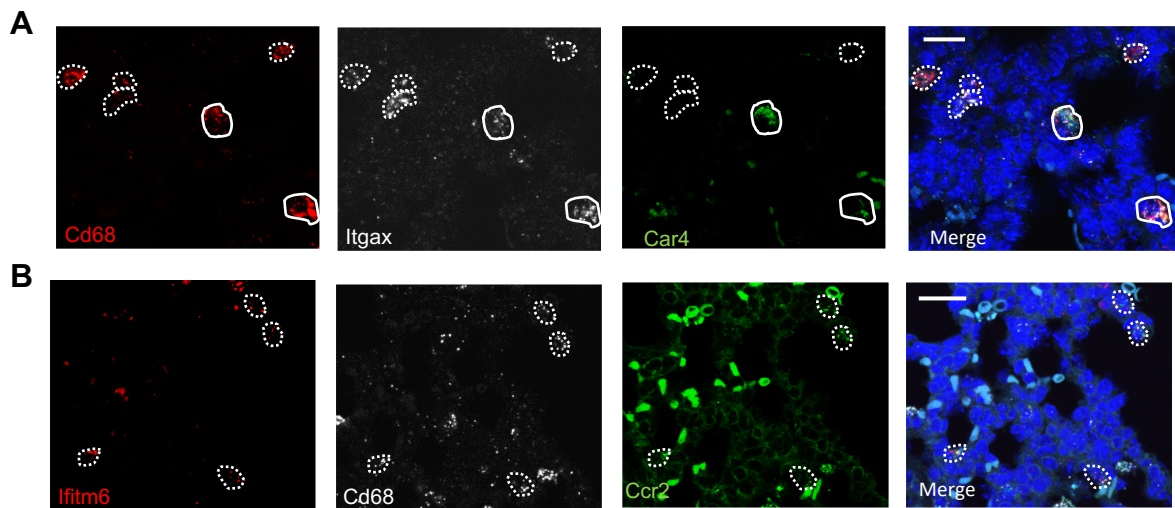

**Supplemental Figure 5. Multiplex In Situ Hybridization to detect specific macrophage clusters.** (A) *In situ* hybridization at P1 to detect *Cd68* (red), *Itgax* (white), *Car4* (green) and a merged image. (B) *In situ* hybridization at P1 to detect *Ifitm6* (red), *Cd68* (white) and *Ccr2* (green) and a merged image. Calibration bar=20 $\mu$ m.

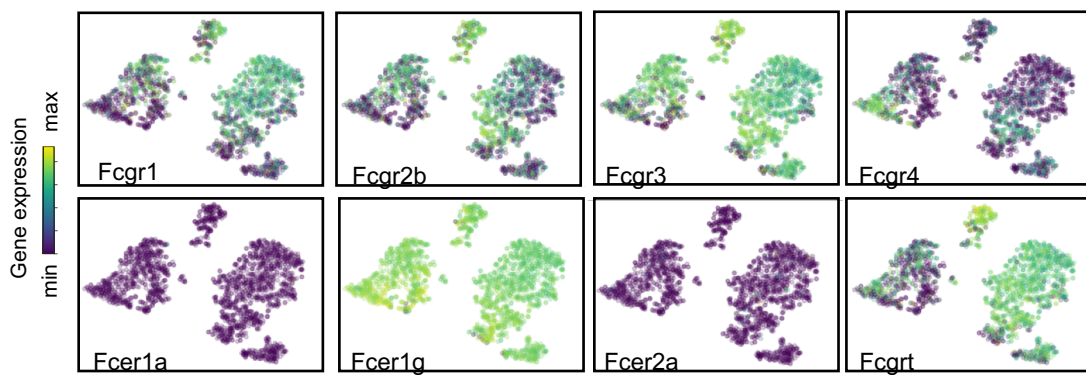

**Supplemental Figure 6. Expression of Fc receptors across macrophage clusters.** T-SNE plots of the expression of Fc receptors *Fcgr1*, *Fcgr2b*, *Fcgr3*, *Fcgr4*, *Fcer1a*, *Fcer1g*, *Fcer2a*, *Fcgrt*.

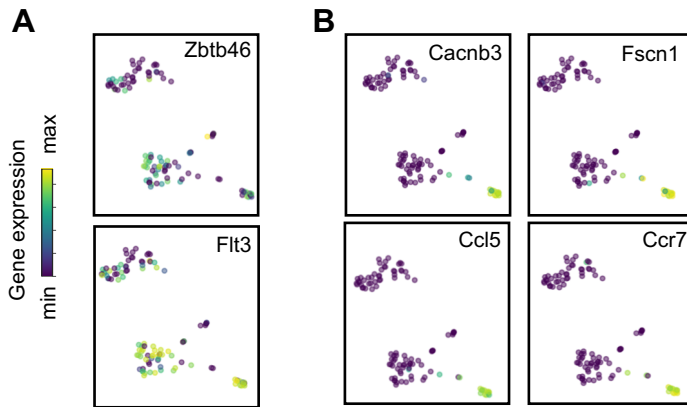

**Supplemental Figure 7. Expression of dendritic cell associated genes.** tSNE plots of (A) pan-DC-associated genes *Zbtb46* and *Flt3*, and (B) DCIII-specific associated genes *Cacnb3*, *Fcscn1*, *Ccl5*, and *Ccr7*.



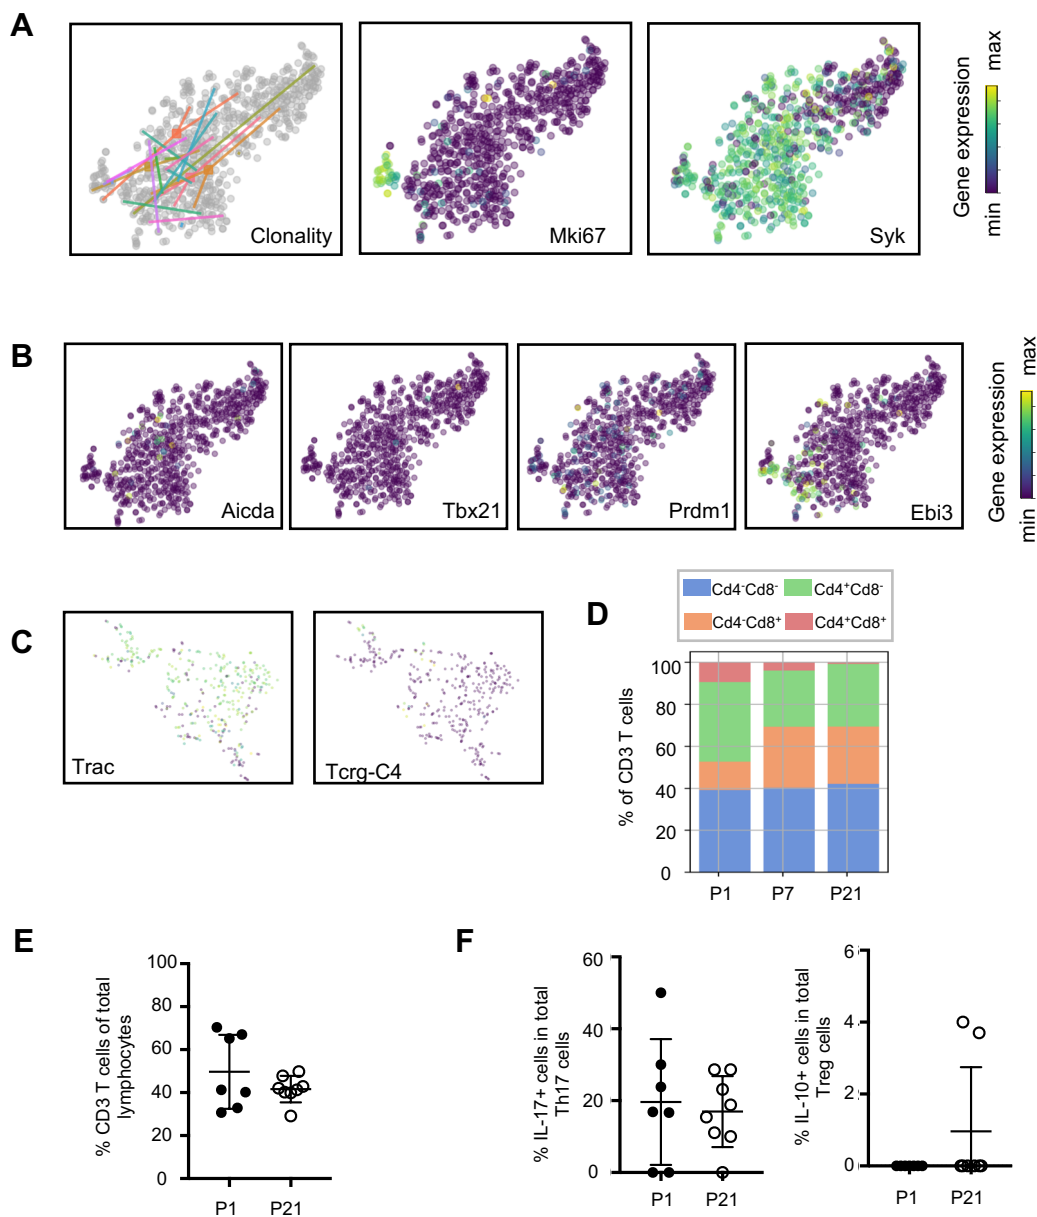

**Supplemental Figure 8. Transcriptional and flow cytometric profiling of lymphocytes.** (A) Clonality and t-SNE plots of *Mki67* and *Syk* within the B cell cluster. t-SNE plots of: (B) B cell-associated genes *Aicda*, *Tbx21*, *Prdm1*, and *Ebi3*; and (C) T cell-associated genes *Trac* and *Tcrq-C4*. (D) Bar graph of the frequencies of  $Cd4^+Cd8^-$ ,  $Cd4^-Cd8^+$ ,  $Cd4^-Cd8^-$ , and  $Cd4^+Cd8^+$  T cells at P1, P7, and P21. (E-F) Flow cytometric analyses of murine lung cells isolated at P1 and P21 assessing the frequencies of (E) CD3+ lymphocytes and (F) IL-17-producing Th17 cells and IL-10-producing T regulatory cells.

## 588   **References**

- 589   1.     Koos BJ and Rajae A. Fetal breathing movements and changes at birth. *Adv Exp Med*  
590 *Biol.* 2014;814:89-101.
- 591   2.     Wirtz HR and Dobbs LG. The effects of mechanical forces on lung functions. *Respir*  
592 *Physiol.* 2000;119:1-17.
- 593   3.     Hillman NH, Kallapur SG and Jobe AH. Physiology of transition from intrauterine to  
594 extrauterine life. *Clin Perinatol.* 2012;39:769-83.
- 595   4.     Lloyd CM and Marsland BJ. Lung Homeostasis: Influence of Age, Microbes, and the  
596 Immune System. *Immunity.* 2017;46:549-561.
- 597   5.     Coussens LM and Pollard JW. Leukocytes in mammary development and cancer. *Cold*  
598 *Spring Harb Perspect Biol.* 2011;3.
- 599   6.     Tanabe S and Yamashita T. The role of immune cells in brain development and  
600 neurodevelopmental diseases. *Int Immunol.* 2018;30:437-444.
- 601   7.     Munro DAD and Hughes J. The Origins and Functions of Tissue-Resident Macrophages  
602 in Kidney Development. *Front Physiol.* 2017;8:837.
- 603   8.     Lenz KM and Nelson LH. Microglia and Beyond: Innate Immune Cells As Regulators of  
604 Brain Development and Behavioral Function. *Front Immunol.* 2018;9:698.
- 605   9.     Rymo SF, Gerhardt H, Wolfhagen Sand F, Lang R, Uv A and Betsholtz C. A two-way  
606 communication between microglial cells and angiogenic sprouts regulates angiogenesis in aortic  
607 ring cultures. *PLoS One.* 2011;6:e15846.
- 608   10.    Riabov V, Gudima A, Wang N, Mickley A, Orekhov A and Kzhyshkowska J. Role of  
609 tumor associated macrophages in tumor angiogenesis and lymphangiogenesis. *Front Physiol.*  
610 2014;5:75.
- 611   11.    Leid J, Carrelha J, Boukarabila H, Epelman S, Jacobsen SE and Lavine KJ. Primitive  
612 Embryonic Macrophages are Required for Coronary Development and Maturation. *Circ Res.*  
613 2016;118:1498-511.
- 614   12.    Rodriguez-Castillo JA, Perez DB, Ntokou A, Seeger W, Morty RE and Ahlbrecht K.  
615 Understanding alveolarization to induce lung regeneration. *Respir Res.* 2018;19:148.
- 616   13.    Restori KH, Srinivasa BT, Ward BJ and Fixman ED. Neonatal Immunity, Respiratory  
617 Virus Infections, and the Development of Asthma. *Front Immunol.* 2018;9:1249.
- 618   14.    Sadeghi K, Berger A, Langgartner M, Prusa AR, Hayde M, Herkner K, Pollak A, Spittler  
619 A and Forster-Waldl E. Immaturity of infection control in preterm and term newborns is associated  
620 with impaired toll-like receptor signaling. *J Infect Dis.* 2007;195:296-302.
- 621   15.    De Kleer I, Willems F, Lambrecht B and Goriely S. Ontogeny of myeloid cells. *Front*  
622 *Immunol.* 2014;5:423.
- 623   16.    Pertmer TM, Oran AE, Madorin CA and Robinson HL. Th1 genetic adjuvants modulate  
624 immune responses in neonates. *Vaccine.* 2001;19:1764-71.
- 625   17.    Lloyd CM and Snelgrove RJ. Type 2 immunity: Expanding our view. *Sci Immunol.* 2018;3.
- 626   18.    Nguyen QH, Pervolarakis N, Nee K and Kessenbrock K. Experimental Considerations for  
627 Single-Cell RNA Sequencing Approaches. *Front Cell Dev Biol.* 2018;6:108.
- 628   19.    Jungblut M, Oeltze K, Zehnter I, Hasselmann D and Bosio A. Standardized preparation of  
629 single-cell suspensions from mouse lung tissue using the gentleMACS Dissociator. *J Vis Exp.*  
630 2009.
- 631   20.    Zanini F, Robinson ML, Croote D, Sahoo MK, Sanz AM, Ortiz-Lasso E, Albornoz LL,  
632 Rosso F, Montoya JG, Goo L, Pinsky BA, Quake SR and Einav S. Virus-inclusive single-cell RNA

633 sequencing reveals the molecular signature of progression to severe dengue. *Proc Natl Acad Sci*  
634 *U S A*. 2018;115:E12363-E12369.

635 21. Traag VA, Waltman L and van Eck NJ. From Louvain to Leiden: guaranteeing well-  
636 connected communities. *Sci Rep*. 2019;9:5233.

637 22. van der Maaten L and Hinton G. Visualizing Data using t-SNE. *J Mach Learn Res*.  
638 2008;9:2579-2605.

639 23. Adamson SE, Griffiths R, Moravec R, Senthivayagam S, Montgomery G, Chen W, Han  
640 J, Sharma PR, Mullins GR, Gorski SA, Cooper JA, Kadl A, Enfield K, Braciale TJ, Harris TE and  
641 Leitinger N. Disabled homolog 2 controls macrophage phenotypic polarization and adipose tissue  
642 inflammation. *J Clin Invest*. 2016;126:1311-22.

643 24. Ledford JG, Kovarova M and Koller BH. Impaired host defense in mice lacking ONZIN.  
644 *J Immunol*. 2007;178:5132-43.

645 25. Tan SY and Krasnow MA. Developmental origin of lung macrophage diversity.  
646 *Development*. 2016;143:1318-27.

647 26. Guilliams M, De Kleer I, Henri S, Post S, Vanhoutte L, De Prijck S, Deswarte K, Malissen  
648 B, Hammad H and Lambrecht BN. Alveolar macrophages develop from fetal monocytes that  
649 differentiate into long-lived cells in the first week of life via GM-CSF. *J Exp Med*. 2013;210:1977-  
650 92.

651 27. Kierdorf K, Prinz M, Geissmann F and Gomez Perdiguero E. Development and function  
652 of tissue resident macrophages in mice. *Semin Immunol*. 2015;27:369-78.

653 28. Pucci F, Venneri MA, Biziato D, Nonis A, Moi D, Sica A, Di Serio C, Naldini L and De  
654 Palma M. A distinguishing gene signature shared by tumor-infiltrating Tie2-expressing  
655 monocytes, blood "resident" monocytes, and embryonic macrophages suggests common functions  
656 and developmental relationships. *Blood*. 2009;114:901-14.

657 29. Oyewumi L, Kaplan F and Sweezey NB. Lgl1, a mesenchymal modulator of early lung  
658 branching morphogenesis, is a secreted glycoprotein imported by late gestation lung epithelial  
659 cells. *Biochem J*. 2003;376:61-9.

660 30. Lan J, Ribeiro L, Mandeville I, Nadeau K, Bao T, Cornejo S, Sweezey NB and Kaplan F.  
661 Inflammatory cytokines, goblet cell hyperplasia and altered lung mechanics in Lgl1+/- mice.  
662 *Respir Res*. 2009;10:83.

663 31. Lang R, Gundlach AL, Holmes FE, Hobson SA, Wynick D, Hokfelt T and Kofler B.  
664 Physiology, signaling, and pharmacology of galanin peptides and receptors: three decades of  
665 emerging diversity. *Pharmacol Rev*. 2015;67:118-75.

666 32. Senger DR and Davis GE. Angiogenesis. *Cold Spring Harb Perspect Biol*.  
667 2011;3:a005090.

668 33. Tanaka M and Siemann DW. Axl signaling is an important mediator of tumor angiogenesis.  
669 *Oncotarget*. 2019;10:2887-2898.

670 34. Benard EL, Racz PI, Rougeot J, Nezhinsky AE, Verbeek FJ, Spaink HP and Meijer AH.  
671 Macrophage-expressed perforins mpeg1 and mpeg1.2 have an anti-bacterial function in zebrafish.  
672 *J Innate Immun*. 2015;7:136-52.

673 35. Iannitti RG, Napolioni V, Oikonomou V, De Luca A, Galosi C, Pariano M, Massi-  
674 Benedetti C, Borghi M, Puccetti M, Lucidi V, Colombo C, Fiscarelli E, Lass-Flörl C, Majo F,  
675 Cariani L, Russo M, Porcaro L, Ricciotti G, Ellemunter H, Ratclif L, De Benedictis FM, Talesa  
676 VN, Dinarello CA, van de Veerdonk FL and Romani L. IL-1 receptor antagonist ameliorates  
677 inflammasome-dependent inflammation in murine and human cystic fibrosis. *Nat Commun*.  
678 2016;7:10791.

- 679 36. Lai MZ and Chen RH. Regulation of inflammation by DAPK. *Apoptosis*. 2014;19:357-63.
- 680 37. Ripoll VM, Irvine KM, Ravasi T, Sweet MJ and Hume DA. Gpnmb is induced in  
681 macrophages by IFN-gamma and lipopolysaccharide and acts as a feedback regulator of  
682 proinflammatory responses. *J Immunol*. 2007;178:6557-66.
- 683 38. Zhang S, Cherwinski H, Sedgwick JD and Phillips JH. Molecular mechanisms of CD200  
684 inhibition of mast cell activation. *J Immunol*. 2004;173:6786-93.
- 685 39. Eckert H, Lux M and Lachmann B. The role of alveolar macrophages in surfactant  
686 turnover. An experimental study with metabolite VIII of bromhexine (Ambroxol). *Lung*.  
687 1983;161:213-8.
- 688 40. Baker AD, Malur A, Barna BP, Ghosh S, Kavuru MS, Malur AG and Thomassen MJ.  
689 Targeted PPAR $\{\gamma\}$  deficiency in alveolar macrophages disrupts surfactant catabolism. *J*  
690 *Lipid Res*. 2010;51:1325-31.
- 691 41. Pandya PH and Wilkes DS. Complement system in lung disease. *Am J Respir Cell Mol*  
692 *Biol*. 2014;51:467-73.
- 693 42. Griffith JW, Sokol CL and Luster AD. Chemokines and chemokine receptors: positioning  
694 cells for host defense and immunity. *Annu Rev Immunol*. 2014;32:659-702.
- 695 43. Matsumura S, Wang B, Kawashima N, Braunstein S, Badura M, Cameron TO, Babb JS,  
696 Schneider RJ, Formenti SC, Dustin ML and Demaria S. Radiation-induced CXCL16 release by  
697 breast cancer cells attracts effector T cells. *J Immunol*. 2008;181:3099-107.
- 698 44. Schyns J, Bai Q, Ruscitti C, Radermecker C, De Schepper S, Chakarov S, Farnir F, Pirottin  
699 D, Ginhoux F, Boeckxstaens G, Bureau F and Marichal T. Non-classical tissue monocytes and two  
700 functionally distinct populations of interstitial macrophages populate the mouse lung. *Nat*  
701 *Commun*. 2019;10:3964.
- 702 45. Galaviz-Hernandez C, Stagg C, de Ridder G, Tanaka TS, Ko MS, Schlessinger D and  
703 Nagaraja R. Plac8 and Plac9, novel placental-enriched genes identified through microarray  
704 analysis. *Gene*. 2003;309:81-9.
- 705 46. Zhao X, Li J, Winkler CA, An P and Guo JT. IFITM Genes, Variants, and Their Roles in  
706 the Control and Pathogenesis of Viral Infections. *Front Microbiol*. 2018;9:3228.
- 707 47. Yona S and Jung S. Monocytes: subsets, origins, fates and functions. *Curr Opin Hematol*.  
708 2010;17:53-9.
- 709 48. Rubenstein PA. The functional importance of multiple actin isoforms. *Bioessays*.  
710 1990;12:309-15.
- 711 49. Capote C and Maccioni RB. The association of tau-like proteins with vimentin filaments  
712 in cultured cells. *Exp Cell Res*. 1998;239:202-13.
- 713 50. Wight TN. Provisional matrix: A role for versican and hyaluronan. *Matrix Biol*. 2017;60-  
714 61:38-56.
- 715 51. Peters JH, Chen GE and Hynes RO. Fibronectin isoform distribution in the mouse. II.  
716 Differential distribution of the alternatively spliced EIIIB, EIIEA, and V segments in the adult  
717 mouse. *Cell Adhes Commun*. 1996;4:127-48.
- 718 52. Tsang CK, Chen M, Cheng X, Qi Y, Chen Y, Das I, Li X, Vallat B, Fu LW, Qian CN,  
719 Wang HY, White E, Burley SK and Zheng XFS. SOD1 Phosphorylation by mTORC1 Couples  
720 Nutrient Sensing and Redox Regulation. *Mol Cell*. 2018;70:502-515 e8.
- 721 53. Fisher AB. Peroxiredoxin 6: a bifunctional enzyme with glutathione peroxidase and  
722 phospholipase A(2) activities. *Antioxid Redox Signal*. 2011;15:831-44.
- 723 54. Rojo R, Raper A, Ozdemir DD, Lefevre L, Grabert K, Wollscheid-Lengeling E, Bradford  
724 B, Caruso M, Gazova I, Sanchez A, Lisowski ZM, Alves J, Molina-Gonzalez I, Davtyan H, Lodge

725 RJ, Glover JD, Wallace R, Munro DAD, David E, Amit I, Miron VE, Priller J, Jenkins SJ,  
726 Hardingham GE, Blurton-Jones M, Mabbott NA, Summers KM, Hohenstein P, Hume DA and  
727 Pridans C. Deletion of a Csf1r enhancer selectively impacts CSF1R expression and development  
728 of tissue macrophage populations. *Nat Commun.* 2019;10:3215.

729 55. Roszer T. Understanding the Mysterious M2 Macrophage through Activation Markers and  
730 Effector Mechanisms. *Mediators Inflamm.* 2015;2015:816460.

731 56. Dankner M, Gray-Owen SD, Huang YH, Blumberg RS and Beauchemin N. CEACAM1  
732 as a multi-purpose target for cancer immunotherapy. *Oncoimmunology.* 2017;6:e1328336.

733 57. Borrego F. The CD300 molecules: an emerging family of regulators of the immune system.  
734 *Blood.* 2013;121:1951-60.

735 58. Hazenbos WL, Gessner JE, Hofhuis FM, Kuipers H, Meyer D, Heijnen IA, Schmidt RE,  
736 Sandor M, Capel PJ, Daeron M, van de Winkel JG and Verbeek JS. Impaired IgG-dependent  
737 anaphylaxis and Arthus reaction in Fc gamma RIII (CD16) deficient mice. *Immunity.* 1996;5:181-  
738 8.

739 59. Barnes N, Gavin AL, Tan PS, Mottram P, Koentgen F and Hogarth PM. FcgammaRI-  
740 deficient mice show multiple alterations to inflammatory and immune responses. *Immunity.*  
741 2002;16:379-89.

742 60. Mancardi DA, Iannascoli B, Hoos S, England P, Daeron M and Bruhns P. FcgammaRIV  
743 is a mouse IgE receptor that resembles macrophage FcepsilonRI in humans and promotes IgE-  
744 induced lung inflammation. *J Clin Invest.* 2008;118:3738-50.

745 61. Hirano M, Davis RS, Fine WD, Nakamura S, Shimizu K, Yagi H, Kato K, Stephan RP and  
746 Cooper MD. IgEb immune complexes activate macrophages through FcgammaRIV binding. *Nat*  
747 *Immunol.* 2007;8:762-71.

748 62. Meredith MM, Liu K, Darrasse-Jeze G, Kamphorst AO, Schreiber HA, Guermontprez P,  
749 Idoyaga J, Cheong C, Yao KH, Niec RE and Nussenzweig MC. Expression of the zinc finger  
750 transcription factor zDC (Zbtb46, Btbd4) defines the classical dendritic cell lineage. *J Exp Med.*  
751 2012;209:1153-65.

752 63. Waskow C, Liu K, Darrasse-Jeze G, Guermontprez P, Ginhoux F, Merad M, Shengelia T,  
753 Yao K and Nussenzweig M. The receptor tyrosine kinase Flt3 is required for dendritic cell  
754 development in peripheral lymphoid tissues. *Nat Immunol.* 2008;9:676-83.

755 64. Helft J, Manicassamy B, Guermontprez P, Hashimoto D, Silvin A, Agudo J, Brown BD,  
756 Schmolke M, Miller JC, Leboeuf M, Murphy KM, Garcia-Sastre A and Merad M. Cross-  
757 presenting CD103+ dendritic cells are protected from influenza virus infection. *J Clin Invest.*  
758 2012;122:4037-47.

759 65. Cheong C, Matos I, Choi JH, Dandamudi DB, Shrestha E, Longhi MP, Jeffrey KL,  
760 Anthony RM, Kluger C, Nchinda G, Koh H, Rodriguez A, Idoyaga J, Pack M, Velinzon K, Park  
761 CG and Steinman RM. Microbial stimulation fully differentiates monocytes to DC-  
762 SIGN/CD209(+) dendritic cells for immune T cell areas. *Cell.* 2010;143:416-29.

763 66. Damek-Poprawa M, Diemer T, Lopes VS, Lillo C, Harper DC, Marks MS, Wu Y, Sparrow  
764 JR, Rachel RA, Williams DS and Boesze-Battaglia K. Melanoregulin (MREG) modulates  
765 lysosome function in pigment epithelial cells. *J Biol Chem.* 2009;284:10877-89.

766 67. Bros M, Dexheimer N, Ross R, Trojandt S, Hohn Y, Tampe J, Sutter A, Jahrling F, Grabbe  
767 S and Reske-Kunz AB. Differential gene expression analysis identifies murine *Cacnb3* as strongly  
768 upregulated in distinct dendritic cell populations upon stimulation. *Gene.* 2011;472:18-27.

769 68. Al-Alwan MM, Rowden G, Lee TD and West KA. Fascin is involved in the antigen  
770 presentation activity of mature dendritic cells. *J Immunol.* 2001;166:338-45.

771 69. Forster R, Davalos-Misslitz AC and Rot A. CCR7 and its ligands: balancing immunity and  
772 tolerance. *Nat Rev Immunol*. 2008;8:362-71.

773 70. Voehringer D. Protective and pathological roles of mast cells and basophils. *Nat Rev*  
774 *Immunol*. 2013;13:362-75.

775 71. Lilla JN, Chen CC, Mukai K, BenBarak MJ, Franco CB, Kalesnikoff J, Yu M, Tsai M,  
776 Piliponsky AM and Galli SJ. Reduced mast cell and basophil numbers and function in Cpa3-Cre;  
777 Mcl-1fl/fl mice. *Blood*. 2011;118:6930-8.

778 72. Dwyer DF, Barrett NA, Austen KF and Immunological Genome Project C. Expression  
779 profiling of constitutive mast cells reveals a unique identity within the immune system. *Nat*  
780 *Immunol*. 2016;17:878-87.

781 73. Thakurdas SM, Melicoff E, Sansores-Garcia L, Moreira DC, Petrova Y, Stevens RL and  
782 Adachi R. The mast cell-restricted tryptase mMCP-6 has a critical immunoprotective role in  
783 bacterial infections. *J Biol Chem*. 2007;282:20809-15.

784 74. Cohen M, Giladi A, Gorki AD, Solodkin DG, Zada M, Hladik A, Miklosi A, Salame TM,  
785 Halpern KB, David E, Itzkovitz S, Harkany T, Knapp S and Amit I. Lung Single-Cell Signaling  
786 Interaction Map Reveals Basophil Role in Macrophage Imprinting. *Cell*. 2018;175:1031-1044 e18.

787 75. Wang S, Song R, Wang Z, Jing Z, Wang S and Ma J. S100A8/A9 in Inflammation. *Front*  
788 *Immunol*. 2018;9:1298.

789 76. Hsieh CS, deRoos P, Honey K, Beers C and Rudensky AY. A role for cathepsin L and  
790 cathepsin S in peptide generation for MHC class II presentation. *J Immunol*. 2002;168:2618-25.

791 77. Wang NS, McHeyzer-Williams LJ, Okitsu SL, Burris TP, Reiner SL and McHeyzer-  
792 Williams MG. Divergent transcriptional programming of class-specific B cell memory by T-bet  
793 and RORalpha. *Nat Immunol*. 2012;13:604-11.

794 78. Pone EJ, Zhang J, Mai T, White CA, Li G, Sakakura JK, Patel PJ, Al-Qahtani A, Zan H,  
795 Xu Z and Casali P. BCR-signalling synergizes with TLR-signalling for induction of AID and  
796 immunoglobulin class-switching through the non-canonical NF-kappaB pathway. *Nat Commun*.  
797 2012;3:767.

798 79. Ma N, Fang Y, Xu R, Zhai B, Hou C, Wang X, Jiang Z, Wang L, Liu Q, Han G and Wang  
799 R. Ebi3 promotes T- and B-cell division and differentiation via STAT3. *Mol Immunol*.  
800 2019;107:61-70.

801 80. Cattoretti G, Angelin-Duclos C, Shaknovich R, Zhou H, Wang D and Alobeid B.  
802 PRDM1/Blimp-1 is expressed in human B-lymphocytes committed to the plasma cell lineage. *J*  
803 *Pathol*. 2005;206:76-86.

804 81. van Zelm MC, Szczepanski T, van der Burg M and van Dongen JJ. Replication history of  
805 B lymphocytes reveals homeostatic proliferation and extensive antigen-induced B cell expansion.  
806 *J Exp Med*. 2007;204:645-55.

807 82. Sommerfeld SD, Cherry C, Schwab RM, Chung L, Maestas DR, Jr., Laffont P, Stein JE,  
808 Tam A, Ganguly S, Housseau F, Taube JM, Pardoll DM, Cahan P and Elisseff JH. Interleukin-  
809 36gamma-producing macrophages drive IL-17-mediated fibrosis. *Sci Immunol*. 2019;4.

810 83. Thebaud B and Abman SH. Bronchopulmonary dysplasia: where have all the vessels gone?  
811 Roles of angiogenic growth factors in chronic lung disease. *Am J Respir Crit Care Med*.  
812 2007;175:978-85.

813 84. Baer C, Squadrito ML, Iruela-Arispe ML and De Palma M. Reciprocal interactions  
814 between endothelial cells and macrophages in angiogenic vascular niches. *Exp Cell Res*.  
815 2013;319:1626-34.

816 85. Fantin A, Vieira JM, Gestri G, Denti L, Schwarz Q, Prykhozhiy S, Peri F, Wilson SW and  
817 Ruhrberg C. Tissue macrophages act as cellular chaperones for vascular anastomosis downstream  
818 of VEGF-mediated endothelial tip cell induction. *Blood*. 2010;116:829-40.

819 86. Schulz C, Gomez Perdiguero E, Chorro L, Szabo-Rogers H, Cagnard N, Kierdorf K, Prinz  
820 M, Wu B, Jacobsen SE, Pollard JW, Frampton J, Liu KJ and Geissmann F. A lineage of myeloid  
821 cells independent of Myb and hematopoietic stem cells. *Science*. 2012;336:86-90.

822 87. van de Laar L, Saelens W, De Prijck S, Martens L, Scott CL, Van Isterdael G, Hoffmann  
823 E, Beyaert R, Saeys Y, Lambrecht BN and Guilliams M. Yolk Sac Macrophages, Fetal Liver, and  
824 Adult Monocytes Can Colonize an Empty Niche and Develop into Functional Tissue-Resident  
825 Macrophages. *Immunity*. 2016;44:755-68.

826 88. Yona S, Kim KW, Wolf Y, Mildner A, Varol D, Breker M, Strauss-Ayali D, Viukov S,  
827 Guilliams M, Misharin A, Hume DA, Perlman H, Malissen B, Zelzer E and Jung S. Fate mapping  
828 reveals origins and dynamics of monocytes and tissue macrophages under homeostasis. *Immunity*.  
829 2013;38:79-91.

830 89. Bain CC, Bravo-Blas A, Scott CL, Perdiguero EG, Geissmann F, Henri S, Malissen B,  
831 Osborne LC, Artis D and Mowat AM. Constant replenishment from circulating monocytes  
832 maintains the macrophage pool in the intestine of adult mice. *Nat Immunol*. 2014;15:929-937.

833 90. Soilleux EJ, Morris LS, Leslie G, Chehimi J, Luo Q, Levroney E, Trowsdale J, Montaner  
834 LJ, Doms RW, Weissman D, Coleman N and Lee B. Constitutive and induced expression of DC-  
835 SIGN on dendritic cell and macrophage subpopulations in situ and in vitro. *J Leukoc Biol*.  
836 2002;71:445-57.

837 91. Merad M, Sathe P, Helft J, Miller J and Mortha A. The dendritic cell lineage: ontogeny  
838 and function of dendritic cells and their subsets in the steady state and the inflamed setting. *Annu*  
839 *Rev Immunol*. 2013;31:563-604.

840 92. Augustin A, Kubo RT and Sim GK. Resident pulmonary lymphocytes expressing the  
841 gamma/delta T-cell receptor. *Nature*. 1989;340:239-41.

842 93. Zhang ZX, Yang L, Young KJ, DuTemple B and Zhang L. Identification of a previously  
843 unknown antigen-specific regulatory T cell and its mechanism of suppression. *Nat Med*.  
844 2000;6:782-9.

845 94. Wolterink-Donselaar IG, Meerding JM and Fernandes C. A method for gender  
846 determination in newborn dark pigmented mice. *Lab Anim (NY)*. 2009;38:35-8.

847 95. Picelli S, Bjorklund AK, Faridani OR, Sagasser S, Winberg G and Sandberg R. Smart-seq2  
848 for sensitive full-length transcriptome profiling in single cells. *Nat Methods*. 2013;10:1096-8.

849 96. Tabula Muris C, Overall c, Logistical c, Organ c, processing, Library p, sequencing,  
850 Computational data a, Cell type a, Writing g, Supplemental text writing g and Principal i. Single-  
851 cell transcriptomics of 20 mouse organs creates a Tabula Muris. *Nature*. 2018;562:367-372.

852 97. Dobin A, Davis CA, Schlesinger F, Drenkow J, Zaleski C, Jha S, Batut P, Chaisson M and  
853 Gingeras TR. STAR: ultrafast universal RNA-seq aligner. *Bioinformatics*. 2013;29:15-21.

854 98. Anders S, Pyl PT and Huber W. HTSeq--a Python framework to work with high-  
855 throughput sequencing data. *Bioinformatics*. 2015;31:166-9.

856 99. Koster J and Rahmann S. Snakemake--a scalable bioinformatics workflow engine.  
857 *Bioinformatics*. 2012;28:2520-2.

858 100. Pedregosa F, Varoquaux G, Gramfort A, Michel V, Thirion B, Grisel O, Blondel M,  
859 Prettenhofer P, Weiss R, Dubourg V, Vanderplas J, Passos A, Cournapeau D, Brucher M, Perrot  
860 M and Duchesnay E. Scikit-learn: Machine Learning in Python. *J Mach Learn Res*. 2011;12:2825-  
861 2830.

862 101. Stubbington MJT, Lonnberg T, Proserpio V, Clare S, Speak A, Dougan G and Teichmann  
863 SA. T cell fate and clonality inference from single-cell transcriptomes. *Nature Methods*.  
864 2016;13:329-332.

865 102. Lindeman I, Emerton G, Mamanova L, Snir O, Polanski K, Qiao SW, Sollid LM,  
866 Teichmann SA and Stubbington MJT. BraCeR: B-cell-receptor reconstruction and clonality  
867 inference from single-cell RNA-seq. *Nature Methods*. 2018;15:563-565.

868 103. Canzar S, Neu KE, Tang QM, Wilson PC and Khan AA. BASIC: BCR assembly from  
869 single cells. *Bioinformatics*. 2017;33:425-427.

870 104. Gupta NT, Vander Heiden JA, Uduman M, Gadala-Maria D, Yaari G and Kleinstein SH.  
871 Change-O: a toolkit for analyzing large-scale B cell immunoglobulin repertoire sequencing data.  
872 *Bioinformatics*. 2015;31:3356-3358.

873 105. Clifford PS, Ella SR, Stupica AJ, Nourian Z, Li M, Martinez-Lemus LA, Dora KA, Yang  
874 Y, Davis MJ, Pohl U, Meininger GA and Hill MA. Spatial distribution and mechanical function  
875 of elastin in resistance arteries: a role in bearing longitudinal stress. *Arterioscler Thromb Vasc*  
876 *Biol*. 2011;31:2889-96.

877
